# 1 **A meta-analysis of genome-wide association studies of epigenetic age**

## 2 **acceleration**

3  
4  
5 Jude Gibson<sup>1\*</sup>, Tom C. Russ<sup>1,4</sup>, Toni-Kim Clarke<sup>1</sup>, David M. Howard<sup>1</sup>, Kathryn L. Evans<sup>4,5</sup>, Rosie M. Walker<sup>4,5</sup>,  
6 Mairead L. Bermingham<sup>5</sup>, Stewart W. Morris<sup>5</sup>, Archie Campbell<sup>5,6</sup>, Caroline Hayward<sup>7</sup>, Alison D. Murray<sup>5,8</sup>, David J.  
7 Porteous<sup>4,5</sup>, Steve Horvath<sup>9,10</sup>, Ake T. Lu<sup>9</sup>, Andrew M. McIntosh<sup>1,4</sup>, Heather C. Whalley<sup>1</sup>, Riccardo E. Marioni<sup>4,5</sup>

8  
9  
10 <sup>1</sup> Division of Psychiatry, Centre for Clinical Brain Sciences, University of Edinburgh, Edinburgh, UK

11 <sup>2</sup> Centre for Dementia Prevention, University of Edinburgh, Edinburgh, UK

12 <sup>3</sup> Alzheimer Scotland Dementia Research Centre, University of Edinburgh, Edinburgh, UK

13 <sup>4</sup> Centre for Cognitive Ageing & Cognitive Epidemiology, University of Edinburgh, Edinburgh, UK

14 <sup>5</sup> Centre for Genomic and Experimental Medicine, Institute of Genetics and Molecular Medicine, University of Edinburgh,  
15 Edinburgh, UK

16 <sup>6</sup> Usher Institute for Population Health Sciences and Informatics, University of Edinburgh, Edinburgh, UK

17 <sup>7</sup> MRC Human Genetics Unit, Institute of Genetics and Molecular Medicine, University of Edinburgh, Edinburgh, UK

18 <sup>8</sup> Aberdeen Biomedical Imaging Centre, University of Aberdeen, Aberdeen, UK

19 <sup>9</sup> Department of Human Genetics, David Geffen School of Medicine, Los Angeles, CA, USA

20 <sup>10</sup> Department of Biostatistics, School of Public Health, University of California-Los Angeles, Los Angeles, CA, USA

21

22

23

24

25 \*Corresponding author

26 E-mail: [jude.gibson@ed.ac.uk](mailto:jude.gibson@ed.ac.uk) (JG)

27

28

29

## 30 **Abstract**

31

32 'Epigenetic age acceleration' is a valuable biomarker of ageing, predictive of morbidity and  
33 mortality, but for which the underlying biological mechanisms are not well established. Two  
34 commonly used measures, derived from DNA methylation, are Horvath-based (Horvath-EAA) and  
35 Hannum-based (Hannum-EAA) epigenetic age acceleration. We conducted genome-wide  
36 association studies of Horvath-EAA and Hannum-EAA in 13,493 unrelated individuals of European  
37 ancestry, to elucidate genetic determinants of differential epigenetic ageing. We identified ten  
38 independent SNPs associated with Horvath-EAA, five of which are novel. We also report 21  
39 Horvath-EAA-associated genes including several involved in metabolism (*NHLRC*, *TPMT*) and  
40 immune system pathways (*TRIM59*, *EDARADD*). GWAS of Hannum-EAA identified one  
41 associated variant (rs1005277), and implicated 12 genes including several involved in innate  
42 immune system pathways (*UBE2D3*, *MANBA*, *TRIM46*), with metabolic functions (*UBE2D3*,  
43 *MANBA*), or linked to lifespan regulation (*CISD2*). Both measures had nominal inverse genetic  
44 correlations with father's age at death, a rough proxy for lifespan. Nominally significant genetic  
45 correlations between Hannum-EAA and lifestyle factors including smoking behaviours and  
46 education support the hypothesis that Hannum-based epigenetic ageing is sensitive to variations in  
47 environment, whereas Horvath-EAA is a more stable cellular ageing process. We identified novel  
48 SNPs and genes associated with epigenetic age acceleration, and highlighted differences in the  
49 genetic architecture of Horvath-based and Hannum-based epigenetic ageing measures.  
50 Understanding the biological mechanisms underlying individual differences in the rate of epigenetic  
51 ageing could help explain different trajectories of age-related decline.

52

53

54

55

## 56 **Author Summary**

57

58 DNA methylation, a type of epigenetic process, is known to vary with age. Methylation levels at  
59 specific sites across the genome can be combined to form estimates of age known as ‘epigenetic  
60 age’. The difference between epigenetic age and chronological age is referred to as ‘epigenetic age  
61 acceleration’, with positive values indicating that a person is biologically older than their years.  
62 Understanding why some people seem to age faster than others could shed light on the biological  
63 processes behind age-related decline; however, the mechanisms underlying differential rates of  
64 epigenetic ageing are largely unknown. Here, we investigate genetic determinants of two commonly  
65 used epigenetic age acceleration measures, based on the Horvath and Hannum epigenetic clocks.  
66 We report novel genetic variants and genes associated with epigenetic age acceleration, and  
67 highlight differences in the genetic factors influencing these two measures. We identify ten genetic  
68 variants and 21 genes associated with Horvath-based epigenetic age acceleration, and one variant  
69 and 12 genes associated with the Hannum-based measure. There were no genome-wide significant  
70 variants or genes in common between the Horvath-based and Hannum-based measures, supporting  
71 the hypothesis that they represent different aspects of ageing. Our results suggest a partial genetic  
72 basis underlying some previously reported phenotypic associations.

73

74

## 75 **Introduction**

76

77 Ageing is associated with a decline in physical and cognitive health, and is the main risk factor for  
78 many debilitating and life-threatening conditions including cardiovascular disease, cancer, and  
79 neurodegeneration (1). Ageing is a multi-dimensional construct, incorporating physical,  
80 psychosocial, and biological changes. Everyone experiences the same rate of chronological ageing,  
81 but the rate of ‘biological ageing’, age-related decline in physiological functions and tissues, differs

82 between individuals. Various phenotypic and molecular biomarkers have been used to study  
83 biological ageing, including a number of 'biological clocks', the best known of which is telomere  
84 length. Telomeres shorten with increasing age, and telomere length has been found to predict  
85 morbidity and mortality (2). More recently, research into epigenetics – chemical modifications to  
86 DNA without altering the genetic sequence – has yielded another method for measuring biological  
87 age.

88

89 DNA methylation is an epigenetic modification, typically characterised by the addition of a methyl  
90 group to a cytosine-guanine dinucleotide (CpG) (3), that can influence gene expression and is  
91 associated with variation in complex phenotypes. This process is essential for normal development  
92 and is associated with a number of key processes including ageing. DNA methylation levels are  
93 dynamic, varying with age across the life course (4,5) and are influenced by both genetic and  
94 environmental factors (6).

95

96 Weighted averages of methylation at multiple CpG sites can be integrated into estimates of  
97 chronological age referred to as 'epigenetic age'. Two influential studies have used this method to  
98 create 'epigenetic clocks', which accurately predict chronological age in humans. Hannum et al.  
99 used DNA methylation profiles from whole blood from two cohorts to identify 71 CpG sites that  
100 could be used to generate an estimate of age (7), while Horvath used data from 51 different tissue  
101 types from multiple studies to identify 353 CpG sites whose methylation levels can be combined to  
102 form an age predictor (8). There are only six CpGs in common across the two epigenetic clocks,  
103 and they are thought to capture slightly different aspects of the biology of ageing (further details are  
104 given in **S1 Text**).

105

106 Both the Hannum and Horvath epigenetic clocks are strongly correlated ( $r>0.95$ ) with chronological  
107 age (7,8). However, despite these high correlations, there can be substantial differences between

108 epigenetic and chronological age in an individual, and it is unclear what drives these differences. A  
109 greater epigenetic age relative to chronological age is commonly described as ‘epigenetic age  
110 acceleration’ (EAA), and implies that a person is biologically older than their years. EAA has been  
111 shown to be informative for both current and future health trajectories (9). Recently, a growing  
112 number of studies have used EAA to investigate age-related disorders, and the epigenetic clock is  
113 increasingly being recognised as a valuable marker of biological ageing (10,11).

114  
115 The simplest definition of EAA is the residual that results from regressing epigenetic age on  
116 chronological age. However, it is well known that the abundance of different cell types in the blood  
117 changes with age (12,13), and hence two broad categories of EAA measures have been  
118 distinguished: those that are independent of age-related changes in blood cell composition, and  
119 those that incorporate and are enhanced by blood cell count information (10). This study focuses on  
120 two commonly used variations, based on the Horvath and Hannum epigenetic clocks, which assess  
121 different metrics to estimate biological ageing. Horvath-based epigenetic age acceleration (Horvath-  
122 EAA) is based on the CpG markers from Horvath’s age predictor and is calculated such that it is  
123 independent of both chronological age and age-related changes in the cellular composition of blood.  
124 Hannum-based epigenetic age acceleration (Hannum-EAA), calculated based on the CpGs  
125 described by Hannum et al., up-weights the contributions of age-associated immune blood cells. As  
126 both the Horvath and Hannum epigenetic clocks correlate well with age, in a population with a wide  
127 age range they are guaranteed to correlate with each other. However, Horvath-based and Hannum-  
128 based epigenetic age acceleration estimates are not guaranteed to be correlated. Full details of the  
129 calculation of Horvath-EAA and Hannum-EAA are given in **S1 Text**.

130  
131 Horvath-EAA, described in previous publications as ‘intrinsic’ epigenetic age acceleration (IEAA),  
132 can be interpreted as a measure of cell-intrinsic ageing that exhibits preservation across multiple  
133 tissues, appears unrelated to lifestyle factors, and probably indicates a fundamental cell ageing

134 process that is largely conserved across cell types (8,10). In contrast, Hannum-EAA, referred to in  
135 previous studies as ‘extrinsic’ epigenetic age acceleration (EEAA), can be considered a biomarker  
136 of immune system ageing, explicitly incorporating aspects of immune system decline such as age-  
137 related changes in blood cell counts, correlating with lifestyle and health-span related  
138 characteristics, and thus yielding a stronger predictor of all-cause mortality (10,14).

139  
140 Previous studies have identified relationships between epigenetic ageing and numerous traits,  
141 including several age-related health outcomes, for example Alzheimer’s disease pathology (15),  
142 cognitive impairment (15), and age at menopause (16). Higher EAA has been associated with  
143 poorer measures of physical and cognitive fitness (9) and higher risk of all-cause mortality (11).  
144 Many associations are specific to either Horvath-EAA or Hannum-EAA, a discordance that may  
145 reflect the differences in the two estimates and supports the theory that they represent different  
146 aspects of ageing (14,17,18).

147  
148 While EAA has been associated with various markers of physical and mental fitness, the  
149 mechanisms underlying epigenetic ageing remain largely unknown. There has been little research  
150 conducted thus far on genetic contributions to epigenetic age acceleration. However, Lu et al.  
151 (2018) recently published results of the first genome-wide association analysis of blood EAA in a  
152 sample of 9,907 individuals, identifying five genetic loci associated with Horvath-EAA and three  
153 Hannum-EAA-associated loci (19).

154  
155 This current study, with a sample size of 13,493 individuals, constitutes the largest study of the  
156 genetic determinants of DNA methylation-based ageing to date. Single nucleotide polymorphism  
157 (SNP)-based and gene-based approaches were used to identify genes and loci associated with  
158 Hannum-based and Horvath-based estimates of EAA. Functional mapping and annotation of genetic  
159 associations were performed, alongside gene-based and gene-set analyses, in an attempt to elucidate

160 the genes and pathways implicated in differential rates of epigenetic ageing between individuals and  
161 shed light on the underlying biological mechanisms. We report novel SNPs and genes associated  
162 with epigenetic age acceleration, and highlight differences in the genetic architectures of the  
163 Horvath-based and Hannum-based EAA measures.

164

165

## 166 **Results**

167

### 168 **Estimation of epigenetic age and epigenetic age acceleration in the GS sample**

169 A summary of the estimated epigenetic age variables is given in **Table A in S1 Data**. Both the  
170 Horvath- and Hannum-based estimates of biological age were highly correlated with chronological  
171 age ( $r=0.94$ ,  $SE=0.005$  and  $r=0.93$ ,  $SE=0.005$  respectively). The two DNA methylation age  
172 estimates were also highly correlated with each other ( $r=0.93$ ,  $SE=0.005$ ); however, the two  
173 estimates of epigenetic age acceleration, Horvath-EAA and Hannum-EAA, were only weakly  
174 correlated ( $r=0.30$ ,  $SE=0.013$ ).

175

### 176 **GWAS of Horvath-EAA and Hannum-EAA in GS and replication of previously identified loci**

177 The GWAS results for the Generation Scotland (GS) cohort yielded two significant ( $P<5\times 10^{-8}$ )  
178 variants for Horvath-EAA, but no SNPs achieved genome-wide significance for association with  
179 Hannum-EAA (minimum  $P$ -value  $7.85\times 10^{-8}$ ) (**Table B in S1 Data**, full output available online at  
180 [www.link\\_live\\_when\\_ms\\_accepted.com](http://www.link_live_when_ms_accepted.com)). Manhattan plots and quantile-quantile plots for the  
181 GWAS of Horvath-EAA and Hannum-EAA are shown in **Figs A and B in S2 Text**. There was a  
182 moderate genetic correlation between the two traits in the GS sample ( $r_G=0.597$ ,  $SE=0.279$ ), and  
183 both measures had high genetic correlations with the previously reported findings of Lu et al.  
184 ( $r_G=0.724$ ,  $SE=0.312$  and  $r_G=1.021$ ,  $SE=0.356$  for Horvath-EAA and Hannum-EAA respectively).  
185 All but one of the significant SNPs from the Lu et al. analysis of Horvath-EAA replicated (same

186 direction of effect and with  $P < 0.05$ ) in GS (**Table C in S1 Data**,  $P$ -value range  $3.25 \times 10^{-2}$  to  
187  $3.53 \times 10^{-8}$ ). Two of the three significant SNPs from Lu et al.'s Hannum-EAA GWAS were  
188 replicated in GS ( $P$ -values  $1.76 \times 10^{-3}$  and  $1.75 \times 10^{-4}$ ).

189

## 190 **GWAS meta-analysis**

191 We conducted genome-wide association meta-analyses of Horvath-EAA and Hannum-EAA using  
192 13,493 European-ancestry individuals aged between ten and 98 years from 12 cohorts, adjusting for  
193 sex. Manhattan plots for Horvath-EAA and Hannum-EAA are shown in **Fig 1**, with QQ plots of the  
194 observed  $P$ -values versus those expected shown in **Fig 2**. We did not find apparent evidence for  
195 genomic inflation in either the GS study (Horvath-EAA: genomic inflation factor  $\lambda_{GC} = 1.017$ ,  
196 Linkage Disequilibrium (LD) score regression intercept (SE) = 1.002 (0.007); Hannum-EAA:  
197  $\lambda_{GC} = 1.023$ , intercept (SE) = 0.998 (0.006), **Table D in S1 Data, Fig B in S2 Text**) or the meta-  
198 analysis (Horvath-EAA:  $\lambda_{GC} = 1.035$ , intercept (SE) = 1.006 (0.008), Hannum-EAA:  $\lambda_{GC} = 1.044$ ,  
199 intercept (SE) = 1.002 (0.007), **Fig 2**); Lu et al. previously reported no evidence for genomic  
200 inflation for any of the individual studies making up their meta-analysis (19).

201

202 We identified 439 variants with a genome-wide significant association ( $P < 5 \times 10^{-8}$ ) with Horvath-  
203 EAA, of which ten were independent. The significantly associated variants mapped to nine genomic  
204 loci on six chromosomes (**Table 1**, full details in **Table E of S1 Data**). Of the ten independent  
205 significant variants identified here, five were novel, that is, not within  $\pm 500$  Kb of a significant  
206 variant ( $P < 5 \times 10^{-8}$ ) reported by Lu et al. (19). The novel findings were a SNP on chromosome  
207 1q24.2 in the *C1orf112* gene, three SNPs on chromosome three, at 3q21.3 (nearest gene: *GATA2-  
208 ASI*), 3q22.3 in the *PIK3CB* gene, and 3q25.1 in the *LINC01214* gene, and a SNP on chromosome  
209 12q23.3 (nearest genes: *RP11-412D9.4* and *TMEM263*). The risk alleles at these loci conferred  
210 between 0.33 (SE = 0.054) and 1.34 (SE = 0.127) years higher Horvath-EAA (**Table 1**). These ten  
211 independent lead SNPs showed complete sign concordance for association with Horvath-EAA



212 across GS and the Lu study (**Table F in S1 Data**). Comparing the genomic loci identified in the  
213 current study with the five reported by Lu et al., only one locus that was previously reported was  
214 not identified at genome-wide significance here (rs11706810 at 3q25.33, meta-analysis  $P$ -value  
215  $8.68 \times 10^{-8}$ ). **Figs C-L in S2 Text** show the regional association plots for the independent signals. Of  
216 the ten independent SNPs achieving genome-wide significance, none associated with any other  
217 phenotype in currently published GWAS available via the NHGRI-EBI catalog.

218 **Table 1. Independent variants with a meta-analysis genome-wide significant association with Horvath-based or Hannum-based epigenetic age**  
 219 **acceleration.**

220

| Phenotype          | Index SNP  | Chromosome | Position  | A1/A2 | Freq   | Beta   | SE        | <i>P</i> -value | Gene <sup>a</sup>           | function                      | Previously reported |
|--------------------|------------|------------|-----------|-------|--------|--------|-----------|-----------------|-----------------------------|-------------------------------|---------------------|
| <b>Horvath-EAA</b> | rs1011267  | 1q24.2     | 169677720 | A/G   | 0.503  | -0.327 | 0.054     | 1.579E-09       | <i>C1orf112</i>             | intron variant                | novel               |
|                    | rs79070372 | 3q21.3     | 128510481 | A/G   | 0.111  | 0.505  | 0.087     | 6.074E-09       | <i>GATA2-AS1</i>            | non coding transcript variant | novel               |
|                    | rs388649   | 3q22.3     | 138777967 | A/T   | 0.495  | -0.338 | 0.055     | 6.054E-10       | <i>PIK3CB</i>               | intron variant                | novel               |
|                    | rs6440667  | 3q25.1     | 150287063 | C/G   | 0.161  | 0.440  | 0.075     | 4.28E-09        | <i>LINC01214</i>            | intron variant                | novel               |
|                    | rs2736099  | 5p15.33    | 1287225   | A/G   | 0.367  | 0.373  | 0.061     | 8.58E-10        | <i>TERT</i>                 | intron variant                | yes                 |
|                    | rs7744541  | 6p22.3     | 18104469  | A/T   | 0.418  | 0.439  | 0.055     | 1.93E-15        |                             | intergenic variant            | yes                 |
|                    | rs76244256 | 6p22.3     | 18140332  | T/C   | 0.046  | -1.341 | 0.127     | 6.231E-26       | <i>TPMT</i>                 | intron variant                | yes                 |
|                    | rs4712953  | 6p22.2     | 25671618  | A/T   | 0.725  | 0.346  | 0.059     | 3.604E-09       | <i>SCGN</i>                 | intron variant                | yes                 |
|                    | rs10778517 | 12q23.3    | 106947886 | T/G   | 0.565  | 0.335  | 0.054     | 4.46E-10        | <i>RP11-412D9.4/TMEM263</i> | unknown                       | novel               |
| rs62078811         | 17q22      | 55031815   | A/G       | 0.218 | -0.369 | 0.065  | 1.158E-08 | <i>STXBP4</i>   | intron variant              | yes                           |                     |
| <b>Hannum-EAA</b>  | rs1005277  | 10p11.21   | 37929331  | A/C   | 0.301  | 0.533  | 0.070     | 2.173E-14       |                             | unknown                       | yes                 |

221

222 Genome-wide significance defined as having a *P*-value of  $P < 5 \times 10^{-8}$ . A1 and A2 refer to the reference allele and non-reference allele for the index SNP, respectively. Freq (allele  
 223 frequency), Beta (effect size), and SE (standard error of effect size) columns pertain to the reference allele, A1. Chromosome and position (in Mb) denote the location of the index  
 224 SNP, and are given with regards to the GRCh38 assembly.

225 <sup>a</sup> Genes are listed if located within +/- 10 kb of a listed SNP.

226

227 The Hannum-EAA GWAS meta-analysis identified 324 genome-wide significant ( $P < 5 \times 10^{-8}$ )  
228 associated variants mapping to a single genomic locus at 10p11.21 with one index SNP (**Fig 1**,  
229 **Table 1**, full details of index SNP in **Table E of S1 Data**). *ZNF25*, a transcription factor associated  
230 with osteoblast differentiation of human skeletal stem cells (20), is the closest gene to this variant,  
231 at a distance of 20 Kb. At this Hannum-EAA-related locus, the risk allele conferred 0.53  
232 (SE=0.070) years higher Hannum-EAA. We replicated two of the three variants significantly  
233 associated with Hannum-EAA in the Lu et al. study; however, based on our clumping criteria with  
234  $r^2 < 0.1$ , we report only one as an independent significant SNP. Conditional analysis revealed no  
235 secondary signal at this locus. The third locus reported in the previous study was not associated at  
236 genome wide significance in this larger sample ( $P = 3.74 \times 10^{-3}$ ). A regional association plot for  
237 10p11.21 is shown in **Fig M in S2 Text**.

238

239 Of the ten independent variants associated with Horvath-EAA, nine exhibited sign-consistent  
240 associations with Hannum-EAA, of which five attained at least nominal significance with  
241 association  $P$ -values less than 0.05 (most significant  $P = 6.9 \times 10^{-5}$ ) (**Table G in S1 Data**). The single  
242 independent SNP associated with Hannum-EAA also exhibited a nominal and sign-consistent  
243 association with Horvath-EAA ( $P = 0.011$ ). Across all SNPs, however, there was little correlation  
244 between the SNP association  $P$ -values for the Horvath-based and Hannum-based epigenetic age  
245 acceleration measures ( $r = 0.104$ , SE=0.0004, **Fig N in S2 Text**).

246

## 247 **Heritability**

248 Using univariate LD score regression, the SNP-based heritabilities of Horvath-EAA and Hannum-  
249 EAA were estimated to be 0.154 (SE=0.042) and 0.194 (SE=0.040) respectively (**Table D in S1**  
250 **Data**), comparable to previous SNP-based heritability estimates but lower than estimates based on  
251 pedigree relationships (19).

252

## 253 **SNP functional annotation**

254 We used FUMA to functionally annotate SNPs in LD ( $r^2 \geq 0.6$ ) with the independent significant  
255 SNPs for each of the epigenetic age acceleration measures. For Horvath-EAA, this resulted in  
256 functional annotation of 825 SNPs (**Table H in S1 Data**). The vast majority of the SNPs were  
257 intergenic (44.85%) or intronic (47.88%), with only five (0.61%) exonic SNPs. 25 SNPs had  
258 CADD scores greater than 12.37, surpassing the suggested threshold to be considered deleterious  
259 and thus providing evidence of pathogenicity (21). The highest CADD scores were found in three  
260 exonic SNPs: rs1800460 and rs1142345 of *TPMT* and rs10949483 of *NHLRC1* (CADD scores  
261 28.40, 28.30 and 18.92 respectively), indicating potentially deleterious protein effects. Six SNPs  
262 (rs413147, rs12631035, rs9851887, rs12189658, rs6915893, rs12199316) had RegulomeDB scores  
263 of 1f, suggesting that variation at these SNPs is likely to affect gene expression. Almost all SNPs  
264 (98.18%) were in open chromatin regions.

265  
266 For Hannum-EAA, functional annotation of 1,382 candidate SNPs indicated a high proportion of  
267 intergenic SNPs (60.49%), while 11.79% were intronic and only three SNPs were located in exons  
268 (**Table I in S1 Data**). 14 SNPs had CADD scores above 12.37, indicating that variation at these  
269 SNPs is potentially deleterious. Although 42.04% of the SNPs were located in open chromatin  
270 regions, there is little evidence that the Hannum-EAA-associated locus contains regulatory regions,  
271 as analysis using RegulomeDB, which integrates a larger collection of regulatory information  
272 encompassing protein binding, motifs, expression quantitative trait loci (eQTLs), and histone  
273 modifications as well as chromatin structure, revealed only one SNP (rs2474568) with a score  
274 below 2.

275

## 276 **Tissue Expression analysis**

277 MAGMA (Multi-marker Analysis of GenoMic Annotation) gene property analysis linking  
278 differences in epigenetic age acceleration with differences in gene expression in various tissue

279 types, or in brain samples of different ages and developmental stages, revealed no significant  
280 relationships after correcting for multiple tests (**Tables J-Q in S1 Data**).

281

### 282 **Identification of expression quantitative trait loci**

283 For the independent SNPs associated with Horvath-EAA and Hannum-EAA, evidence of eQTLs  
284 was explored using the Genotype-Tissue expression (GTEx) v7 database. Seven of the ten  
285 independent significantly associated SNPs for Horvath-EAA, and the single independent significant  
286 Hannum-EAA-associated SNP were identified as potential eQTLs (**Table R in S1 Data**). Notably,  
287 rs388649 is associated with expression of *ESYT3*, which has a role in lipid transport and  
288 metabolism pathways (22,23), expression of *FAIM*, which is associated with apoptosis and  
289 autophagy (24), in a number of skin and brain tissues, and *PIK3CB*, which regulates vital cell  
290 functions including proliferation and survival (25,26). rs76244256, the variant most strongly  
291 associated with Horvath-EAA, shows eQTL evidence for *NHLRC1* expression, which is associated  
292 with glycogen metabolism (27), across multiple tissues. The Hannum-EAA-associated SNP,  
293 rs1005277, affects the expression of several zinc finger proteins involved in transcriptional  
294 regulation (28).

295

### 296 **Gene-based analysis**

297 MAGMA v1.6 was used to identify gene-level associations with each EAA measure. SNPs were  
298 mapped to 17,798 protein coding genes, with genome-wide significance defined at  
299  $P=0.05/17,798=2.809 \times 10^{-6}$ . A total of 21 genes attained genome-wide significance for association  
300 with Horvath-EAA (**Table 2**, full details in **Table S in S1 Data**). As expected, many of these genes  
301 were located in the same regions as the lead SNPs. Three genes at 6p22.3, *NHLRC1*, *TPMT*, and  
302 *KDM1B*, had the lowest *P*-values of  $1.251 \times 10^{-23}$ ,  $4.639 \times 10^{-23}$ , and  $7.68 \times 10^{-11}$  respectively; all these  
303 genes are involved in metabolism-related pathways (27,29,30). Although containing no genome-  
304 wide significant SNPs, 3q25.33 appears to be an important genomic region for Horvath-EAA, with

305 four significantly associated genes including *TRIM59* and *KPNA4*, which play roles in the immune  
306 system (31,32). Two further significant genes are *FAIM* and *TERT*, whose functions include  
307 apoptosis and autophagy (24), and telomere length-associated ageing and apoptosis (33,34)  
308 respectively. Twelve genes were significantly associated with Hannum-EAA (**Table 2, Table S in**  
309 **S1 Data**). Genes of interest include *MTRNR2L7*, a neuroprotective and anti-apoptotic factor  
310 (35,36), and *TRIM46* and *MUC1*, both located at 1q22, and which are involved with innate immune  
311 system pathways (31,37). The 4q24 cytogenetic band houses several genes significantly associated  
312 with Hannum-EAA: *MANBA* and *UBE2D3* have metabolic and innate immune system functions  
313 (23,38) while *CISD2* regulates autophagy and is involved in life span control (39,40). Comparing  
314 the results of the gene-based association analyses of Horvath-based and Hannum-based EAA, there  
315 was no overlap, and the correlation between gene-based association *P*-values for Horvath-EAA and  
316 Hannum-EAA was low ( $r=0.117$ ,  $SE=0.007$ , **Fig O in S2 Text**). Manhattan plots and QQ plots for  
317 the gene-based analysis of both epigenetic age acceleration measures are shown in **Figs P and Q in**  
318 **S2 Text**.

319 **Table 2. Results of MAGMA gene-based association analysis for Horvath-based and Hannum-based epigenetic age acceleration.**  
 320

| Phenotype    | Gene                    | Chr | N_SNPs     | P-value                                              | Function/related pathways                                                     |
|--------------|-------------------------|-----|------------|------------------------------------------------------|-------------------------------------------------------------------------------|
| Horvath-EAA  | <i>SELP</i>             | 1   | 148        | 1.6883E-07                                           | Immunoglobulin E responsiveness                                               |
|              | <i>EDARADD</i>          | 1   | 516        | 4.2627E-07                                           | Innate immune system, cytokine signalling in immune system                    |
|              | <i>GATA2</i>            | 3   | 72         | 1.0663E-07                                           | Stem cell maintenance and hematopoietic development                           |
|              | <i>ESYT3</i>            | 3   | 93         | 6.5973E-07                                           | Metabolism, lipid transport                                                   |
|              | <i>CEP70</i>            | 3   | 164        | 1.0891E-06                                           | Organelle biogenesis and maintenance                                          |
|              | <i>FAIM</i>             | 3   | 49         | 2.4177E-08                                           | Apoptosis and autophagy; regulates B-cell signalling and differentiation      |
|              | <i>PIK3CB</i>           | 3   | 175        | 2.52E-08                                             | Coordinates cell functions e.g. proliferation, survival, migration            |
|              | <i>IFT80</i>            | 3   | 150        | 1.2622E-07                                           | Organelle biogenesis and maintenance; intraflagellar transport                |
|              | <i>SMC4</i>             | 3   | 77         | 9.8909E-07                                           | Changes in chromosome structure during mitotic segregation                    |
|              | <i>TRIM59</i>           | 3   | 105        | 1.7737E-07                                           | Multifunctional regulator for innate immune signalling pathways               |
|              | <i>KPNA4</i>            | 3   | 104        | 2.9437E-07                                           | Cytokine signalling in immune system; protein transporter activity            |
|              | <i>TERT</i>             | 5   | 90         | 4.0455E-08                                           | Roles in ageing and apoptosis; regulation of telomerase.                      |
|              | <i>NHLRC1</i>           | 6   | 76         | 1.2512E-23                                           | Clearance of toxic polyglucosan and protein aggregates; metabolism pathways   |
|              | <i>TPMT</i>             | 6   | 151        | 4.6385E-23                                           | Drug metabolism - cytochrome P450; thiopurine S methyltransferase activity    |
|              | <i>KDM1B</i>            | 6   | 248        | 7.6758E-11                                           | Metabolism of proteins, regulates histone lysing methylation                  |
|              | <i>SCGN</i>             | 6   | 202        | 3.8379E-10                                           | Calcium binding protein; neuroscience, Ca, cAMP and lipid signalling pathways |
|              | <i>TMEM72</i>           | 10  | 123        | 1.1154E-06                                           | Transmembrane protein                                                         |
|              | <i>RFX4</i>             | 12  | 299        | 9.4786E-07                                           | Transcriptional regulatory network in embryonic stem cell                     |
|              | <i>RIC8B</i>            | 12  | 155        | 1.0988E-06                                           | Can activate some G-alpha proteins; odorant signal transduction.              |
|              | <i>C12orf23/TMEM263</i> | 12  | 98         | 6.321E-09                                            | Transmembrane protein                                                         |
| <i>ZNF70</i> | 22                      | 79  | 2.7934E-06 | Transcriptional regulation; gene expression pathways |                                                                               |
| Hannum-EAA   | <i>TRIM46</i>           | 1   | 27         | 2.66E-06                                             | Innate immune system; cytokine signalling in immune system                    |
|              | <i>MUC1</i>             | 1   | 15         | 7.33E-07                                             | Cytokine signalling in immune system; bacterial infections in CF airways      |
|              | <i>MANBA</i>            | 4   | 190        | 1.31E-06                                             | Glycosaminoglycan metabolism; innate immune system                            |
|              | <i>UBE2D3</i>           | 4   | 154        | 1.19E-06                                             | Metabolism of proteins; innate immune system                                  |
|              | <i>CISD2</i>            | 4   | 54         | 1.18E-06                                             | Regulator of autophagy; life span control; glucose/energy metabolism pathways |

|                 |    |     |          |                                                            |
|-----------------|----|-----|----------|------------------------------------------------------------|
| <i>SLC9B1</i>   | 4  | 217 | 2.56E-06 | Sperm motility and fertility, ion channel transport        |
| <i>MTRNR2L7</i> | 10 | 52  | 5.20E-07 | Neuroprotective and antiapoptotic factor                   |
| <i>ZNF248</i>   | 10 | 204 | 2.22E-07 | Transcriptional regulation; gene expression pathways       |
| <i>ZNF25</i>    | 10 | 99  | 1.23E-08 | Transcriptional regulation; gene expression pathways       |
| <i>ZNF33A</i>   | 10 | 159 | 8.29E-09 | Transcriptional regulation; gene expression pathways       |
| <i>ZNF37A</i>   | 10 | 146 | 3.79E-10 | Transcriptional regulation; gene expression pathways       |
| <i>DNTT</i>     | 10 | 131 | 2.51E-07 | DNA double-strand break repair; hematopoietic cell lineage |

321

322 Genome-wide significant results after Bonferroni correction for multiple testing ( $P < 2.809 \times 10^{-6}$ ) are reported. N\_SNPs is the number of SNPs in the gene.



### 323 **Gene-set and pathway analysis**

324 Using a competitive test of enrichment implemented in MAGMA v1.6, we did not identify any gene  
325 sets that were significantly associated with either Horvath-EAA or Hannum-EAA after Bonferroni  
326 correction for multiple testing. **Tables T and U in S1 Data** show the top 100 gene-sets for Horvath-  
327 EAA and Hannum-EAA respectively.

328

### 329 **Genetic correlations**

330 The SNP-based genetic correlation between Horvath-EAA and Hannum-EAA in the meta-analysis  
331 dataset, determined using LD score regression, was 0.571 (SE=0.132,  $P=1.605 \times 10^{-5}$ ), suggesting a  
332 moderate overlap in the genetic factors influencing these two measures of epigenetic age  
333 acceleration. We also explored genetic correlations between Horvath-EAA/Hannum-EAA and 218  
334 other health and behavioural traits using LD score regression analysis of summary-level data,  
335 implemented in the online software LD Hub (41). None of these phenotypes had a significant  
336 genetic correlation ( $P_{FDR} < 0.05$ ) with either Horvath-EAA or Hannum-EAA after applying false  
337 discovery rate correction (most significant correlation with Horvath-EAA: father's age at death,  
338  $P_{FDR}=0.160$ ; with Hannum-EAA: waist-to-hip ratio,  $P_{FDR}=0.065$ ). This correction, however, may be  
339 overly conservative, as not all the tested traits are independent, with several being identical or  
340 highly correlated, and nominally significant correlations ( $P_{uncorrected} < 0.05$ ) were found with a  
341 number of traits (**Table 3**).

342  
343  
344

**Table 3. Nominally significant genetic correlations ( $P_{uncorrected} < 0.05$ ) between Horvath-EAA/Hannum-EAA and other health and behavioural traits.**

| Phenotype                                   | Trait                                                                  | Genetic Correlation  | SE     | P-value |        |
|---------------------------------------------|------------------------------------------------------------------------|----------------------|--------|---------|--------|
| Horvath-EAA                                 | Fathers age at death                                                   | -0.472               | 0.144  | 0.001   |        |
|                                             | Urate                                                                  | 0.278                | 0.089  | 0.002   |        |
|                                             | Waist-to-hip ratio                                                     | 0.194                | 0.064  | 0.002   |        |
|                                             | Waist circumference                                                    | 0.178                | 0.064  | 0.005   |        |
|                                             | ICV                                                                    | -0.403               | 0.163  | 0.013   |        |
|                                             | Forced expiratory volume in 1 second (FEV1)/Forced Vital capacity(FVC) | -0.170               | 0.078  | 0.030   |        |
|                                             | Extreme waist-to-hip ratio                                             | 0.306                | 0.146  | 0.036   |        |
|                                             | Child birth weight                                                     | -0.274               | 0.131  | 0.037   |        |
|                                             | Childhood IQ                                                           | -0.317               | 0.152  | 0.037   |        |
|                                             | Leucine                                                                | 0.450                | 0.222  | 0.043   |        |
|                                             | Glycoprotein acetyls; mainly a1-acid glycoprotein                      | 0.360                | 0.183  | 0.049   |        |
|                                             | Hannum-EAA                                                             | Waist-to-hip ratio   | 0.225  | 0.062   | 0.0003 |
|                                             |                                                                        | Waist circumference  | 0.210  | 0.067   | 0.002  |
|                                             |                                                                        | Parents age at death | -0.455 | 0.148   | 0.002  |
| Type 2 Diabetes                             |                                                                        | 0.331                | 0.114  | 0.004   |        |
| Years of schooling 2013                     |                                                                        | -0.231               | 0.083  | 0.005   |        |
| Years of schooling 2016                     |                                                                        | -0.162               | 0.058  | 0.006   |        |
| Birth weight                                |                                                                        | 0.211                | 0.079  | 0.007   |        |
| HDL cholesterol                             |                                                                        | -0.210               | 0.082  | 0.010   |        |
| Former vs Current smoker                    |                                                                        | -0.330               | 0.130  | 0.011   |        |
| Forced expiratory volume in 1 second (FEV1) |                                                                        | -0.239               | 0.095  | 0.012   |        |
| Forced expiratory volume in 1 second (FEV1) |                                                                        | -0.371               | 0.149  | 0.013   |        |
| Hip circumference                           |                                                                        | 0.163                | 0.066  | 0.013   |        |
| Intelligence                                |                                                                        | -0.169               | 0.070  | 0.016   |        |
| Cigarettes smoked per day                   |                                                                        | 0.326                | 0.138  | 0.018   |        |
| Ever vs never smoked                        |                                                                        | 0.202                | 0.088  | 0.022   |        |
| College completion                          |                                                                        | -0.195               | 0.086  | 0.023   |        |

|                                                  |        |       |       |
|--------------------------------------------------|--------|-------|-------|
| Age of first birth                               | -0.156 | 0.070 | 0.026 |
| HOMA-B                                           | 0.305  | 0.137 | 0.026 |
| Fasting insulin main effect                      | 0.237  | 0.107 | 0.027 |
| HbA1C                                            | -0.277 | 0.126 | 0.028 |
| Childhood IQ                                     | -0.286 | 0.130 | 0.028 |
| Fathers age at death                             | -0.287 | 0.131 | 0.028 |
| Triglycerides                                    | 0.136  | 0.065 | 0.036 |
| Phospholipids in medium LDL                      | -0.410 | 0.200 | 0.040 |
| Free cholesterol in large LDL                    | -0.485 | 0.237 | 0.041 |
| Anorexia Nervosa                                 | -0.152 | 0.074 | 0.041 |
| Amyotrophic lateral sclerosis                    | 0.363  | 0.178 | 0.042 |
| Obesity class 1                                  | 0.135  | 0.067 | 0.042 |
| Years of schooling (proxy cognitive performance) | -0.171 | 0.084 | 0.042 |
| Phospholipids in large LDL                       | -0.471 | 0.232 | 0.043 |
| Phospholipids in very small VLDL                 | -0.373 | 0.184 | 0.043 |
| Free cholesterol in IDL                          | -0.439 | 0.220 | 0.046 |
| Celiac disease                                   | -0.265 | 0.134 | 0.047 |
| Extreme waist-to-hip ratio                       | 0.285  | 0.145 | 0.048 |
| Total cholesterol in large LDL                   | -0.430 | 0.219 | 0.049 |

345

346

Genetic correlations were determined using bivariate Linkage Disequilibrium score regression implemented in the online software LD Hub. SE is the standard error of the genetic

347

correlation estimate; *P*-value is the association *P*-value for the genetic correlation estimate; ICV – intracranial volume; LDL – low density lipoprotein; IDL – intermediate density

348

lipoprotein; VLDL – very low density lipoprotein.

349

350 Both epigenetic age acceleration measures had nominally significant positive genetic correlations  
351 with a range of traits pertaining to adiposity, and negative correlations with father's age at death and  
352 childhood IQ. Nominally significant genetic correlations were observed between Hannum-EAA, but  
353 not Horvath-EAA, and a wide range of traits including measures relating to education, smoking  
354 behaviour, various lipid- and cholesterol-related measures, diabetes and related glyceic measures,  
355 and parent's age at death. Some of these results have previously been reported (19), but many are  
356 novel. The current study did, however, fail to replicate a number of previously reported correlations,  
357 including with age at menopause (19). Details of the genetic correlations of all the tested traits with  
358 Horvath-EAA and Hannum-EAA are given in **Tables V and W in S1 Data**, respectively.

359

360

## 361 **Discussion**

362

363 This study investigated genetic markers of epigenetic ageing in a sample of 13,493 individuals of  
364 European ancestry. We examined genetic determinants of both Horvath-based (adjusted for the  
365 composition of age-related blood cells) and Hannum-based (immune system-associated) epigenetic  
366 age acceleration, sometimes referred to as 'intrinsic' and 'extrinsic' epigenetic age acceleration, to  
367 gain insight into the regulation of epigenetic ageing. We report several novel findings in addition to  
368 replicating a sub-set of previous results. The meta-analysis of Horvath-EAA identified ten  
369 independent associated SNPs, doubling the number reported to date, and highlighted 21 genes  
370 involved in Horvath-based epigenetic ageing. A single genome-wide significant variant was  
371 identified for Hannum-EAA, along with 12 implicated genes. We uncovered limited evidence of  
372 functionality within some associated genomic loci, with many SNPs located in regions of open  
373 chromatin and a smaller number in regulatory regions. Some loci also contained regions where  
374 genetic variation is predicted to be deleterious.

375

376 A number of the genes significantly associated with Horvath-EAA are related to metabolism  
377 (*NHLRC1*, *TPMT*, *KDM1B*, and *ESYT3*), consistent with several studies reporting phenotypic  
378 associations between Horvath-based EAA and metabolic syndrome characteristics and supporting  
379 the suggestion of a role in tracking metabolic ageing (14,18). Others are involved in immune system  
380 pathways (*TRIM59*, *KPNA4*, *EDARADD*), while several have roles in cellular processes linked to  
381 ageing: apoptosis and autophagy (*FAIM*), ageing and autophagy (*TERT*), and coordinating vital cell  
382 functions (*PIK3CB*). *PIK3CB* plays a role in the signal transduction of insulin and insulin-like  
383 pathways (42), and genetic variants at this locus have been related to insulin-like growth factor  
384 levels in plasma, and human longevity (43).

385  
386 Genes associated with Hannum-based EAA, often referred to as immune system ageing, include  
387 several involved in innate immune system pathways (e.g. *TRIM46* and *MUC1*) or with metabolic  
388 and immune system functions (*MANBA*, *UBE2D3*). Other associated genes of interest include those  
389 with roles relating to ageing and longevity: *MTRNR2L7* is a neuroprotective and anti-apoptotic  
390 factor, and *CISD2* regulates autophagy and is a fundamentally important regulator of lifespan.  
391 Mouse studies indicate that *CISD2* ameliorates age-associated degeneration of skin, skeletal muscle,  
392 and neurons, protects mitochondria from age-related damage and functional decline, and attenuates  
393 age-associated reduction in energy metabolism (44), while *CISD2* deficiency leads to a number of  
394 phenotypic features suggestive of premature ageing (45).

395  
396 Our LD score regression analysis replicated the positive genetic correlations with central adiposity  
397 reported by Lu et al. (2018) at nominal significance levels, supporting the suggestion that observed  
398 phenotypic associations (14,18) may result in part from a shared genetic aetiology. We did not,  
399 however, replicate previously reported correlations between Horvath-EAA and metabolic disease-  
400 related traits or diabetes, and found these traits to be correlated with Hannum-EAA at only nominal  
401 significance levels in our larger sample (19). We also found no correlation between epigenetic age

402 acceleration and age at menopause. Nominally significant genetic correlations between Hannum-  
403 based, but not Horvath-based, epigenetic age acceleration, and lifestyle factors such as smoking  
404 behaviour and education level, provide some evidence for a genetic basis underlying the phenotypic  
405 results we reported previously (18), and provide tentative support to the hypothesis that Hannum-  
406 based epigenetic ageing is relatively sensitive to changes in environment and lifestyle. Father's age  
407 at death, a rough proxy for lifespan (46), was nominally significantly correlated with both EAA  
408 measures, and parents' age at death was additionally correlated with Hannum-EAA, consistent with  
409 a body of work demonstrating robustly that EAA predicts life span (10,11). Aside from these,  
410 genetic correlations with age-related traits were surprisingly few: it is possible that this could reflect  
411 an overly conservative correction for the multiple tests carried out, or low statistical power, rather  
412 than a genuine lack of correlations (**Table D in S1 Data**). While the mean  $\chi^2$  values (1.059 and  
413 1.054 for Horvath-EAA and Hannum-EAA respectively) indicate a sufficient level of polygenicity  
414 within the dataset for use with LD score regression, the heritability Z-scores for Horvath-EAA and  
415 Hannum-EAA are 3.69 and 4.91 respectively. The recommendation is that genetic correlation  
416 analysis should be restricted to GWAS with a heritability Z-score of 4 or more, on the grounds of  
417 interpretability and power (41), so the Horvath-based results particularly should be interpreted with  
418 caution.

419

420 This study of epigenetic age acceleration benefits from having a large sample size. Increasing  
421 GWAS sample size increases the power to detect associated loci, and is often achieved, as in this  
422 case, by combining smaller studies in a meta-analysis. Meta-analytic GWAS are, however,  
423 sometimes hampered by differences in how a trait is measured between individual studies. In this  
424 instance, use of the online calculator to calculate the EAA measures and using the same algorithm  
425 and output columns for each study, mitigates this. The current study comprises only individuals of  
426 European ancestry, which confers a further advantage as epigenetic ageing rates have been shown

427 to differ between ethnicities (47). It should be noted, however, that although large for these  
428 phenotypes, the size of the sample studied here is still small in terms of GWASs of polygenic traits.

429

430 Despite the large sample overlap, some results of this study differ from those reported by Lu et al.  
431 (2018). One reason for this could be that only European-ancestry individuals were included in this  
432 analysis whereas the Lu study reports results from a mixed ancestry sample. Another likely  
433 contributing factor is the age ranges involved: the GS cohort, not included in Lu's analysis but  
434 which makes up 38% of the total sample in the current study, has a mean age of 48.5 years, 14.4  
435 years younger than the mean age of the remaining cohorts. Given that epigenetic age changes over  
436 the life course, although not necessarily in parallel with chronological age, this could help explain  
437 the discrepancies between the studies.

438

439 Horvath-based and Hannum-based epigenetic age acceleration are thought to represent different  
440 aspects of ageing. Hannum-EAA has been described as a biomarker of immune system ageing, and  
441 has been found to be associated with a wide range of traits (14,18), indicating a sensitivity to  
442 variations in environment and lifestyle. By contrast, Horvath-EAA is considered to be a  
443 fundamental, intrinsic cellular ageing process, largely unrelated to lifestyle factors, although  
444 associations with a range of metabolic syndrome characteristics suggest a role in tracking metabolic  
445 ageing processes. Our results reflect this to a large degree, with more nominally significant genetic  
446 correlations found with Hannum-EAA than Horvath-EAA, including items relating to education,  
447 smoking, intelligence, and various cholesterol measures. Meanwhile the greater number of  
448 significant variants, genomic loci, and genes associated with Horvath-EAA are consistent with the  
449 hypothesis that this measure of 'cell-intrinsic' ageing is less related to lifestyle and more under  
450 genetic control, and thus more likely to remain relatively stable. Despite these differences, however,  
451 our results indicate some common features. The significant genetic correlation of 0.57 between the  
452 two measures suggests a moderate overlap in the genetic factors influencing the two phenotypes

453 despite the biomarkers being based on almost entirely distinct CpG sets. Both also appear to be  
454 influenced by genes associated with metabolic and immune system pathways, although the specific  
455 genes involved are different.

456

## 457 **Conclusions**

458 This study provided insight into the genetic determinants of differential biological ageing through  
459 the identification of genes and genetic variants associated with epigenetic age acceleration. We  
460 doubled the number of SNPs associated with Horvath-EAA reported to date, and report 21 genes  
461 significantly associated with this phenotype, including *PIK3CB*, linked to human longevity. We  
462 identified 12 Hannum-EAA-associated genes, one of which, *CISD2*, has a fundamental role in  
463 lifespan control. Our results also highlighted differences in the genetic architecture of the Horvath-  
464 based and Hannum-based EAA measures, with no genome-wide significant SNPs or genes common  
465 to the two, providing substantial support for the hypothesis that they represent different aspects of  
466 ageing.

467

468 While the genetic information coded by our DNA sequence remains largely fixed throughout the  
469 lifetime, the expression of our genes is primarily regulated by epigenetic factors, which change over  
470 time. Epigenetic age increases with, but not in parallel with, chronological age; individual  
471 differences in the rate of epigenetic ageing potentially explain why trajectories of ageing differ  
472 between individuals. Understanding what causes these differences could potentially inform  
473 therapeutic interventions to delay the onset of age-related decline and improve ageing outcomes.

474

475

## 476 **Methods**

477

### 478 **Generation Scotland cohort**



479 We carried out genome-wide association analyses of Horvath-EAA and Hannum-EAA in a subset  
480 of individuals (n=5,100) from the Generation Scotland: Scottish Family Health Study (GS) for  
481 whom both genetic and DNA methylation data were available. GS is a family- and population-  
482 based cohort recruited via general medical practices across Scotland; the recruitment protocol and  
483 sample characteristics are described in detail elsewhere (48,49). In brief, the full cohort comprises  
484 23,960 individuals aged between 18 and 98 years. Pedigree information was available for all  
485 participants, detailed socio-demographic and clinical data were collected, and biological samples  
486 were taken for genotyping.

487

#### 488 **DNA methylation and derivation of epigenetic age acceleration variables in GS**

489 DNA methylation data were obtained from peripheral blood (n=5,091) or saliva (n=10) samples for  
490 5,101 individuals from GS, with quality control checks carried out using standard methods outlined  
491 in **S1 Text**, and described in full elsewhere (18). After QC, the dataset comprised beta-values for  
492 860,928 methylation loci. Methylation-based age estimates (DNAm age) and epigenetic age  
493 acceleration variables (Horvath-EAA and Hannum-EAA, described in **S1 Text**) were obtained from  
494 the online DNA Methylation Age Calculator (<https://dnamage.genetics.ucla.edu/>) developed by  
495 Horvath (8). Normalised DNA methylation beta-values were submitted to the calculator, using the  
496 'Advanced Analysis for Blood Data' option, and undergoing further normalisation within the  
497 calculator algorithm to make the data comparable to the training data of the epigenetic clock. One  
498 individual was flagged by the calculator as having a gender mismatch, and was therefore omitted  
499 from downstream analysis, leaving a total of 5,100 individuals for the GWAS of Horvath-EAA and  
500 Hannum-EAA in GS. Blood cell abundance measures were also estimated by the online calculator,  
501 based on DNA methylation levels, as described previously (50).

502

#### 503 **Genotyping, imputation, and quality control in GS**

504 An overview of biological sample collection, DNA extraction, genotyping, imputation using the  
505 Haplotype Research Consortium reference panel (v1.1), and quality control for GS is included in **S1**  
506 **Text**; full details have been described previously (51). A total of 20,032 individuals passed all  
507 quality control thresholds. Following the removal of monomorphic or multiallelic variants and  
508 SNPs with a low imputation quality or a minor allele frequency below 1%, an imputed dataset with  
509 8,633,288 hard called variants remained to be used in the genome-wide association analysis.

510

### 511 **GWAS of Horvath-EAA and Hannum-EAA in GS**

512 GWAS of Horvath-EAA and Hannum-EAA in GS were conducted using mixed linear model based  
513 association (MLMA) analysis (52), implemented in GCTA (v1.25) (53), and adjusting for sex to  
514 account for the higher epigenetic age acceleration in men than in women (7,11,47). In order to  
515 account for population stratification, it is common to conduct ancestry-informative principal  
516 components analysis on the population in question, and use a number of the top-ranking PCs from  
517 this analysis as covariates in the GWAS. However, as GS is a family-based sample, we employed a  
518 different approach to capture population structure. In place of PCs, two genomic relationship  
519 matrices (GRMs) were included in the GWAS, as this method has been shown to account for  
520 potential upward biases due to excessive relationships, and thus allows the inclusion of closely and  
521 distantly related individuals in genetic analyses (54). The first GRM included pairwise relationship  
522 coefficients for all individuals, while the second had off-diagonal elements  $<0.05$  set to 0; full  
523 details of the methods involved and construction of the GRMs is given elsewhere (55). The results  
524 of univariate LD score regression analysis (56) (**Table D in S1 Data**) indicate that the two GRMs  
525 adequately accounted for population stratification, so it was not necessary to include ancestry-  
526 informative PCs in the GWAS.

527

### 528 **GWAS meta-analysis of Horvath-EAA and Hannum-EAA**

529 We obtained summary statistics from the largest European-ancestry analysis of epigenetic age  
530 acceleration to date (n=8,393, Lu et al., 2018, summary information in **Table X in S1 Data**), and  
531 meta-analysed these with GS (details above). We chose not to include available data from non-  
532 European samples, despite the advantages of increased sample size, as different ethnicities have  
533 been shown to have different epigenetic ageing rates (47). Association summary statistics from the  
534 GWAS of the two EAA phenotypes in GS and the Lu et al. study were meta-analysed using the  
535 inverse variance-weighted approach, which weights effect sizes by sampling distribution. This  
536 analysis was implemented in METAL (57), conditional on each variant being available in both  
537 samples. As SNPs which co-located with CpGs from the Hannum- or Horvath-based DNAm age  
538 predictors had already been excluded from Lu et al.'s analysis, it was not necessary to repeat this  
539 step. This resulted in 5,932,107 genetic variants for Horvath-EAA and 5,931,171 variants for  
540 Hannum-EAA, in a meta-analysis dataset containing 13,493 participants.

541  
542 The meta-analytic summary statistics produced by METAL were uploaded to FUMA  
543 ([fuma.ctglab.nl](http://fuma.ctglab.nl)) (58), which identified index SNPs and genomic risk loci related to epigenetic age  
544 acceleration. FUMA selects independent significant SNPs based on their having a genome-wide  
545 significant  $P$ -value ( $P < 5 \times 10^{-8}$ ) and being independent from each other ( $r^2 < 0.6$  by default) within a  
546 250kb window. The European subset of the 1000 Genomes phase 3 reference panel (59) was used  
547 to map LD. SNPs in LD with these independent significant SNPs ( $r^2 \geq 0.6$ ) within a 250kb window,  
548 and which have a minor allele frequency (MAF)  $> 1\%$  within the 1000 Genomes reference panel,  
549 were included for further annotation and used for gene prioritization. A subset of the independent  
550 significant SNPs, those in LD with each other at  $r^2 < 0.1$  within a 250kb window, were identified as  
551 lead SNPs. Genomic risk loci, including all independent signals that were physically close or  
552 overlapping in a single locus, were identified by merging any lead SNPs that were closer than  
553 250kb apart (meaning that a genomic risk locus could contain multiple lead SNPs, with each locus  
554 represented by the lead SNP with the lowest  $P$ -value in that locus).

555

556 Conditional analysis was implemented using GCTA software (53) to ascertain whether associated  
557 genetic loci harboured more than one independent causal variant, conditioning on the lead SNP at  
558 the locus and using GS as the reference panel for inferring the LD pattern. SNPs which remained  
559 significantly associated ( $P < 5 \times 10^{-8}$ ) with the phenotype after conditioning on the lead SNP were  
560 considered to be further independent associated variants.

561

562 Manhattan plots and quantile-quantile plots were generated in R version 3.2.3 using the 'qqman'  
563 package, and regional SNP association results were visualised with LocusZoom (60). SNPs which  
564 surpassed the threshold for genome-wide significance in our meta-analyses were checked against  
565 the NHGRI-EBI catalog of published GWAS (61,62) ([www.ebi.ac.uk/gwas/](http://www.ebi.ac.uk/gwas/)) to determine whether  
566 they had previously been observed in association analysis.

567

### 568 **Heritability analysis**

569 To estimate the SNP-based heritability for Horvath-EAA and Hannum-EAA, univariate Linkage  
570 Disequilibrium score regression (56) was applied to the GWAS summary statistics for both  
571 measures. This method also provides metrics to evaluate the proportion of inflation in the test  
572 statistics caused by confounding biases such as residual population stratification, relative to genuine  
573 polygenicity. We used pre-computed LD scores, estimated from the European-ancestry samples in  
574 the 1000 Genomes Project (63).

575

### 576 **SNP functional annotation**

577 Functional annotation, using all SNPs located within the genomic risk loci which were nominally  
578 significant ( $P < 0.05$ ), had a  $MAF \geq 1\%$ , and were in LD of  $r^2 \geq 0.6$ , was carried out in FUMA v1.3.0  
579 (58). In order to investigate the functional consequences of variation at these SNPs, they were first

580 matched (based on chromosome, base pair position, reference and non-reference alleles) to a  
581 database containing functional annotations from a number of repositories:

- 582 • ANNOVAR categories (64), used to identify a SNP's function and determine its position  
583 within the genome.
- 584 • Combined Annotation Dependent Depletion (CADD) scores (21), a measure of the  
585 deleteriousness of genetic variation at a SNP to protein structure and function, with higher  
586 scores indicating more deleterious variants.
- 587 • RegulomeDB (RDB) scores (65), based on data from expression quantitative trait loci  
588 (eQTLs) as well as chromatin marks, with lower scores given to variants with the greatest  
589 evidence for having regulatory function.
- 590 • Chromatin states (66–68), indicating the level of accessibility of genomic regions, described  
591 on a 15 point scale, where lower chromatin scores indicate a greater level of accessibility to  
592 the genome at that site; generally, between 1 and 7 is considered an open chromatin state.

593

#### 594 **Gene-based analysis**

595 Gene-based analysis was performed for each phenotype using the results of our association analysis,  
596 using default settings in MAGMA (Multi-marker Analysis of GenoMic Annotation) v1.6 (69),  
597 integrated within the FUMA web application. Summary statistics of SNPs located within protein-  
598 coding genes were aggregated to assess the simultaneous effect of all SNPs in the gene on the  
599 phenotype. The European panel of the 1000 Genomes phase 3 data was used as a reference panel to  
600 account for LD (59). Genetic variants were assigned to protein-coding genes obtained from  
601 Ensembl build 85, resulting in 17,798 genes being analysed. After Bonferroni correction  
602 ( $\alpha=0.05/17,798$ ), a threshold for genome-wide significant genes was defined at  $P<2.809\times 10^{-6}$ .

603

#### 604 **Tissue Expression analysis**

605 To determine whether differential expression levels of a gene in specific tissues relate to the

606 association of that gene with EAA, gene-property analysis was conducted using MAGMA,  
607 integrated within the FUMA web application, using average expression of genes per tissue type as a  
608 gene covariate. Four types of tissue expression analysis were performed separately, for 30 general  
609 tissue types, 53 specific tissue types (both taken from the GTEx v7 RNA-seq database (70,71)), 29  
610 different ages of brain samples, and 11 developmental stages of brain samples (from BrainSpan  
611 (72)) , with Bonferroni correction over 30, 53, 29 and 11 tests respectively to control for multiple  
612 testing.

613

#### 614 **eQTL analysis**

615 The independent genome-wide significant variants identified for Horvath-EAA and Hannum-EAA  
616 in the GWAS meta-analysis were assessed to determine whether they were potential expression  
617 quantitative trait loci (eQTLs), using the Genotype Tissue Expression Portal (GTEx) v7 (71), which  
618 used gene expression data from multiple human tissues linked to genotype data to provide  
619 information on eQTLs. eQTL mapping carried out within FUMA maps SNPs to genes which likely  
620 affect expression of those genes within 1Mb, i.e. *cis*-eQTLs.

621

#### 622 **Gene-set analysis**

623 To assess whether the Horvath-EAA and Hannum-EAA GWAS meta-analysis results are enriched  
624 for various gene-sets and provide insight into the involvement of specific biological pathways in the  
625 genetic etiology of the phenotype, the gene-based analysis results were used to perform competitive  
626 gene-set and pathway analysis using default parameters in MAGMA v1.6, integrated within FUMA.  
627 The reference genome was 1000 genomes phase 3. This analysis used gene annotation files from the  
628 Molecular Signatures Database v5.2 for "Curated gene sets", covering chemical and genetic  
629 perturbations, and Canonical pathways, and "GO terms", covering three ontologies: biological  
630 process, cellular components, and molecular function. A total of 10,894 gene-sets were examined  
631 for enrichment in Horvath-EAA and Hannum-EAA, with a Bonferroni correction applied to control

632 for multiple testing. Thus genome-wide significance was defined at  $P=0.05/10,894=4.59 \times 10^{-6}$ .

633

### 634 **Genetic correlations**

635 Cross trait LD score regression (73) was used to calculate genetic correlations between Horvath-  
636 based and Hannum-based EAA in our meta-analysis, and then between Horvath-EAA/Hannum-  
637 EAA and 218 other behavioural and disease-related traits for which GWAS summary data were  
638 available through LD Hub (41); traits derived from non-Caucasian or mixed ethnicity samples were  
639 removed prior to analysis. This method exploits the correlational structure of SNPs across the  
640 genome and uses test statistics provided from GWAS summary estimates to calculate the genetic  
641 correlations between traits (73). We checked whether our meta-analysis datasets had sufficient  
642 evidence of a polygenic signal, indicated by a heritability Z-score of  $>4$  and a mean  $\chi^2$  statistic  
643 of  $>1.02$  (73). By default, a MAF filter of  $>1\%$  was applied, and indels and strand ambiguous SNPs  
644 were removed. We filtered to HapMap3 SNPs, and SNPs whose alleles did not match those in the  
645 1000 Genomes European reference sample were removed. LD scores and weights for use with  
646 European populations were downloaded from ([http://www.broadinstitute.org/~bulik/eur\\_ldscores/](http://www.broadinstitute.org/~bulik/eur_ldscores/)).  
647 We did not constrain the intercepts in our analysis, as we could not quantify the exact amount of  
648 sample overlap between cohorts. False discovery rate correction was applied across the 218 traits to  
649 correct for multiple testing (74).

650

### 651 **Ethics Statement**

652 Generation Scotland received ethical approval from the NHS Tayside Committee on Medical  
653 Research Ethics (REC Reference Number: 05/S1401/89). GS has also been granted Research Tissue  
654 Bank status by the Tayside Committee on Medical Research Ethics (REC Reference Number:  
655 10/S1402/20), providing generic ethical approval for a wide range of uses within medical research.  
656 All participants provided written informed consent. Details of ethics approval and consent to  
657 participate for the cohorts included in the Lu et al. (2018) study can be found in their publication.

658

## 659 **Acknowledgements**

660

661 We are grateful to the families and individuals who took part in all the cohort studies included in  
662 this meta-analysis: the Framington Heart Study, TwinsUK, Women's Health Initiative, European  
663 Prospective Investigation into Cancer–Norfolk, Baltimore Longitudinal Study of Aging,  
664 Invecchiare in Chianti, aging in the Chianti Area Study, Brisbane Systems Genetics Study, Lothian  
665 Birth Cohorts of 1921 and 1936, and Generation Scotland. We further acknowledge all those  
666 involved in participant recruitment, data collection, sample processing, and quality control  
667 procedures, including project managers, interviewers, clinical staff, laboratory technicians, clerical  
668 workers, research scientists, and statisticians.

669

670

671

672

673

674

675

676

677

678

679

680

681

682

683



684 **Fig 1. Manhattan plots for genome-wide meta-analyses (n=13,493) of Horvath-based and**  
685 **Hannum-based epigenetic age acceleration.**

686 SNP-based Manhattan plots for Horvath-EAA and Hannum-EAA, with  $-\log_{10}$  transformed  $P$ -values for each SNP  
687 plotted against chromosomal location. The red line indicates the threshold for genome-wide significance ( $P < 5 \times 10^{-8}$ )  
688 and the blue line for suggestive associations ( $P < 1 \times 10^{-5}$ ).

689

690

691 **Fig 2. QQ plots for the meta-analyses of Horvath-based and Hannum-based epigenetic age**  
692 **acceleration.**

693 Quantile-quantile plots for the genome-wide meta-analyses of Horvath-EAA and Hannum-EAA, showing the expected  
694 distribution of GWAS test statistics,  $-\log_{10}(p)$ , versus the observed distribution.

695

696

697

698

699

700

701

702

703

704

705

706

707

708

709

## 710 **References**

711

- 712 1. Niccoli T, Partridge L. Ageing as a Risk Factor for Disease. *Curr Biol* [Internet]. 2012 Sep 11 [cited 2018 Jun  
713 4];22(17):R741–52. Available from:  
714 <https://www.sciencedirect.com/science/article/pii/S0960982212008159?via%3Dihub>
- 715 2. Rode L, Nordestgaard BG, Bojesen SE. Peripheral Blood Leukocyte Telomere Length and Mortality Among 64  
716 637 Individuals From the General Population. *JNCI J Natl Cancer Inst* [Internet]. 2015 Jun 1 [cited 2018 Sep  
717 25];107(6). Available from: <https://academic.oup.com/jnci/article-lookup/doi/10.1093/jnci/djv074>
- 718 3. Beck S, Rakan V. The methylome: approaches for global DNA methylation profiling. *Trends Genet* [Internet].  
719 2008 May 1 [cited 2018 May 14];24(5):231–7. Available from:  
720 <https://www.sciencedirect.com/science/article/pii/S0168952508000577?via%3Dihub>
- 721 4. Bollati V, Schwartz J, Wright R, Litonjua A, Tarantini L, Suh H, et al. Decline in genomic DNA methylation  
722 through aging in a cohort of elderly subjects. *Mech Ageing Dev* [Internet]. 2009 Apr [cited 2018 May  
723 14];130(4):234–9. Available from: <http://www.ncbi.nlm.nih.gov/pubmed/19150625>
- 724 5. Christensen BC, Houseman EA, Marsit CJ, Zheng S, Wrensch MR, Wiemels JL, et al. Aging and Environmental  
725 Exposures Alter Tissue-Specific DNA Methylation Dependent upon CpG Island Context. Schübeler D, editor.  
726 *PLoS Genet* [Internet]. 2009 Aug 14 [cited 2018 May 14];5(8):e1000602. Available from:  
727 <http://dx.plos.org/10.1371/journal.pgen.1000602>
- 728 6. Shah S, McRae AF, Marioni RE, Harris SE, Gibson J, Henders AK, et al. Genetic and environmental exposures  
729 constrain epigenetic drift over the human life course. *Genome Res* [Internet]. 2014 Nov 1 [cited 2018 May  
730 14];24(11):1725–33. Available from: <http://www.ncbi.nlm.nih.gov/pubmed/25249537>
- 731 7. Hannum G, Guinney J, Zhao L, Zhang L, Hughes G, Sada S, et al. Genome-wide methylation profiles reveal  
732 quantitative views of human aging rates. *Mol Cell* [Internet]. 2013 Jan 24 [cited 2018 May 14];49(2):359–67.  
733 Available from: <http://www.ncbi.nlm.nih.gov/pubmed/23177740>
- 734 8. Horvath S. DNA methylation age of human tissues and cell types. *Genome Biol* [Internet]. 2013 Dec 10 [cited  
735 2018 May 14];14(10):R115. Available from: [http://genomebiology.biomedcentral.com/articles/10.1186/gb-  
736 2013-14-10-r115](http://genomebiology.biomedcentral.com/articles/10.1186/gb-2013-14-10-r115)

- 737 9. Marioni RE, Shah S, McRae AF, Ritchie SJ, Muniz-Terrera G, Harris SE, et al. The epigenetic clock is correlated  
738 with physical and cognitive fitness in the Lothian Birth Cohort 1936. *Int J Epidemiol* [Internet]. 2015 Aug 1  
739 [cited 2018 May 14];44(4):1388–96. Available from: [https://academic.oup.com/ije/article-](https://academic.oup.com/ije/article-lookup/doi/10.1093/ije/dyu277)  
740 [lookup/doi/10.1093/ije/dyu277](https://academic.oup.com/ije/article-lookup/doi/10.1093/ije/dyu277)
- 741 10. Chen BH, Marioni RE, Colicino E, Peters MJ, Ward-Caviness CK, Tsai P-C, et al. DNA methylation-based  
742 measures of biological age: meta-analysis predicting time to death. *Aging (Albany NY)* [Internet]. 2016 Sep 28  
743 [cited 2018 May 14];8(9):1844–65. Available from: <http://www.ncbi.nlm.nih.gov/pubmed/27690265>
- 744 11. Marioni RE, Shah S, McRae AF, Chen BH, Colicino E, Harris SE, et al. DNA methylation age of blood predicts all-  
745 cause mortality in later life. *Genome Biol* [Internet]. 2015 Jan 30 [cited 2018 May 14];16(1):25. Available from:  
746 <http://genomebiology.com/2015/16/1/25>
- 747 12. Fagnoni FF, Vescovini R, Passeri G, Bologna G, Pedrazzoni M, Lavagetto G, et al. Shortage of circulating naive  
748 CD8(+) T cells provides new insights on immunodeficiency in aging. *Blood* [Internet]. 2000 May 1 [cited 2019  
749 Jan 21];95(9):2860–8. Available from: <http://www.ncbi.nlm.nih.gov/pubmed/10779432>
- 750 13. Miller RA. The aging immune system: primer and prospectus. *Science* [Internet]. 1996 Jul 5 [cited 2019 Jan  
751 21];273(5271):70–4. Available from: <http://www.ncbi.nlm.nih.gov/pubmed/8658199>
- 752 14. Quach A, Levine ME, Tanaka T, Lu AT, Chen BH, Ferrucci L, et al. Epigenetic clock analysis of diet, exercise,  
753 education, and lifestyle factors. *Aging (Albany NY)* [Internet]. 2017 Feb 14 [cited 2018 May 14];9(2):419–46.  
754 Available from: <http://www.ncbi.nlm.nih.gov/pubmed/28198702>
- 755 15. Levine ME, Lu AT, Bennett DA, Horvath S. Epigenetic age of the pre-frontal cortex is associated with neuritic  
756 plaques, amyloid load, and Alzheimer’s disease related cognitive functioning. *Aging (Albany NY)* [Internet].  
757 2015 Dec [cited 2018 May 14];7(12):1198–211. Available from:  
758 <http://www.ncbi.nlm.nih.gov/pubmed/26684672>
- 759 16. Levine ME, Lu AT, Chen BH, Hernandez DG, Singleton AB, Ferrucci L, et al. Menopause accelerates biological  
760 aging. *Proc Natl Acad Sci U S A* [Internet]. 2016 Aug 16 [cited 2018 May 14];113(33):9327–32. Available from:  
761 <http://www.ncbi.nlm.nih.gov/pubmed/27457926>
- 762 17. Horvath S, Ritz BR. Increased epigenetic age and granulocyte counts in the blood of Parkinson’s disease  
763 patients. *Aging (Albany NY)* [Internet]. 2015 Dec [cited 2018 May 14];7(12):1130–42. Available from:  
764 <http://www.ncbi.nlm.nih.gov/pubmed/26655927>

- 765 18. McCartney DL, Stevenson AJ, Walker RM, Gibson J, Morris SW, Campbell A, et al. DNA methylation age  
766 acceleration and risk factors for Alzheimer's disease. *bioRxiv* [Internet]. 2018 Mar 8 [cited 2018 Jun  
767 12];278945. Available from: <https://www.biorxiv.org/content/early/2018/03/08/278945>
- 768 19. Lu AT, Xue L, Salfati EL, Chen BH, Ferrucci L, Levy D, et al. GWAS of epigenetic aging rates in blood reveals a  
769 critical role for TERT. *Nat Commun* [Internet]. 2018 Dec 26 [cited 2018 May 14];9(1):387. Available from:  
770 <http://www.nature.com/articles/s41467-017-02697-5>
- 771 20. Twine NA, Harkness L, Kassem M, Wilkins MR. Transcription factor ZNF25 is associated with osteoblast  
772 differentiation of human skeletal stem cells. *BMC Genomics* [Internet]. 2016 [cited 2018 Nov 5];17(1):872.  
773 Available from: <http://www.ncbi.nlm.nih.gov/pubmed/27814695>
- 774 21. Kircher M, Witten DM, Jain P, O'Roak BJ, Cooper GM, Shendure J. A general framework for estimating the  
775 relative pathogenicity of human genetic variants. *Nat Genet* [Internet]. 2014 Mar 2 [cited 2018 May  
776 14];46(3):310–5. Available from: <http://www.nature.com/articles/ng.2892>
- 777 22. Saheki Y, Bian X, Schauder CM, Sawaki Y, Surma MA, Klose C, et al. Control of plasma membrane lipid  
778 homeostasis by the extended synaptotagmins. *Nat Cell Biol* [Internet]. 2016 May 11 [cited 2018 Jun  
779 11];18(5):504–15. Available from: <http://www.nature.com/articles/ncb3339>
- 780 23. Belinky F, Nativ N, Stelzer G, Zimmerman S, Iny Stein T, Safran M, et al. PathCards: multi-source consolidation  
781 of human biological pathways. *Database (Oxford)* [Internet]. 2015 [cited 2018 Jun 12];2015. Available from:  
782 <http://www.ncbi.nlm.nih.gov/pubmed/25725062>
- 783 24. Segura MF, Sole C, Pascual M, Moubarak RS, Jose Perez-Garcia M, Gozzelino R, et al. The Long Form of Fas  
784 Apoptotic Inhibitory Molecule Is Expressed Specifically in Neurons and Protects Them against Death Receptor-  
785 Triggered Apoptosis. *J Neurosci* [Internet]. 2007 Oct 17 [cited 2018 Jun 12];27(42):11228–41. Available from:  
786 <http://www.ncbi.nlm.nih.gov/pubmed/17942717>
- 787 25. Krasilnikov MA. Phosphatidylinositol-3 kinase dependent pathways: the role in control of cell growth, survival,  
788 and malignant transformation. *Biochemistry (Mosc)* [Internet]. 2000 Jan [cited 2018 Jun 12];65(1):59–67.  
789 Available from: <http://www.ncbi.nlm.nih.gov/pubmed/10702641>
- 790 26. Castaing-Berthou A, Malet N, Radojkovic C, Cabou C, Gayral S, Martinez LO, et al. PI3K $\beta$  Plays a Key Role in  
791 Apolipoprotein A-I-Induced Endothelial Cell Proliferation Through Activation of the Ecto-F1-ATPase/P2Y1  
792 Receptors. *Cell Physiol Biochem* [Internet]. 2017 [cited 2018 Jun 11];42(2):579–93. Available from:

- 793 <http://www.ncbi.nlm.nih.gov/pubmed/28578353>
- 794 27. Couarch P, Vernia S, Gourfinkel-An I, Lesca G, Gataullina S, Fedirko E, et al. Lafora progressive myoclonus  
795 epilepsy: NHLRC1 mutations affect glycogen metabolism. *J Mol Med (Berl)* [Internet]. 2011 Sep [cited 2018 Jun  
796 11];89(9):915–25. Available from: <http://www.ncbi.nlm.nih.gov/pubmed/21505799>
- 797 28. Laity JH, Lee BM, Wright PE. Zinc finger proteins: new insights into structural and functional diversity. *Curr*  
798 *Opin Struct Biol* [Internet]. 2001 Feb 1 [cited 2018 Oct 4];11(1):39–46. Available from:  
799 <https://www.sciencedirect.com/science/article/pii/S0959440X00001676?via%3Dihub>
- 800 29. Krynetski EY, Evans WE. Genetic polymorphism of thiopurine S-methyltransferase: molecular mechanisms and  
801 clinical importance. *Pharmacology* [Internet]. 2000 Sep [cited 2018 Jun 11];61(3):136–46. Available from:  
802 <http://www.ncbi.nlm.nih.gov/pubmed/10971199>
- 803 30. Nagaoka K, Hino S, Sakamoto A, Anan K, Takase R, Umehara T, et al. Lysine-specific demethylase 2 suppresses  
804 lipid influx and metabolism in hepatic cells. *Mol Cell Biol* [Internet]. 2015 Apr [cited 2018 Jun 11];35(7):1068–  
805 80. Available from: <http://www.ncbi.nlm.nih.gov/pubmed/25624347>
- 806 31. Ozato K, Shin D-M, Chang T-H, Morse HC. TRIM family proteins and their emerging roles in innate immunity.  
807 *Nat Rev Immunol* [Internet]. 2008 Nov 1 [cited 2018 Jun 11];8(11):849–60. Available from:  
808 <http://www.nature.com/articles/nri2413>
- 809 32. Yang J, Lu C, Wei J, Guo Y, Liu W, Luo L, et al. Inhibition of KPNA4 attenuates prostate cancer metastasis.  
810 *Oncogene* [Internet]. 2017 [cited 2018 Jun 11];36(20):2868–78. Available from:  
811 <http://www.ncbi.nlm.nih.gov/pubmed/27941876>
- 812 33. Jakob S, Haendeler J. Molecular mechanisms involved in endothelial cell aging: role of telomerase reverse  
813 transcriptase. *Z Gerontol Geriatr* [Internet]. 2007 Oct [cited 2018 Jun 11];40(5):334–8. Available from:  
814 <http://link.springer.com/10.1007/s00391-007-0482-y>
- 815 34. Mattson MP, Klapper W. Emerging roles for telomerase in neuronal development and apoptosis. *J Neurosci*  
816 *Res* [Internet]. 2001 Jan 1 [cited 2018 Jun 11];63(1):1–9. Available from: <http://doi.wiley.com/10.1002/1097-4547%2820010101%2963%3A1%3C1%3A%3AAID-JNR1%3E3.0.CO%3B2-I>
- 817
- 818 35. Tajima H, Niikura T, Hashimoto Y, Ito Y, Kita Y, Terashita K, et al. Evidence for in vivo production of Humanin  
819 peptide, a neuroprotective factor against Alzheimer’s disease-related insults. *Neurosci Lett* [Internet]. 2002

- 820 May 24 [cited 2018 Jun 11];324(3):227–31. Available from:
- 821 <https://www.sciencedirect.com/science/article/pii/S0304394002001994?via%3Dihub>
- 822 36. Guo B, Zhai D, Cabezas E, Welsh K, Nouraini S, Satterthwait AC, et al. Humanin peptide suppresses apoptosis  
823 by interfering with Bax activation. *Nature* [Internet]. 2003 May 4 [cited 2018 Jun 11];423(6938):456–61.  
824 Available from: <http://www.nature.com/articles/nature01627>
- 825 37. Agrawal B, Krantz MJ, Parker J, Longenecker BM. Expression of MUC1 mucin on activated human T cells:  
826 implications for a role of MUC1 in normal immune regulation. *Cancer Res* [Internet]. 1998 Sep 15 [cited 2018  
827 Jun 11];58(18):4079–81. Available from: <http://www.ncbi.nlm.nih.gov/pubmed/9751614>
- 828 38. Shi Y, Yuan B, Zhu W, Zhang R, Li L, Hao X, et al. Ube2D3 and Ube2N are essential for RIG-I-mediated MAVS  
829 aggregation in antiviral innate immunity. *Nat Commun* [Internet]. 2017 May 4 [cited 2018 Jun 12];8:15138.  
830 Available from: <http://www.nature.com/doi/10.1038/ncomms15138>
- 831 39. Chen Y-F, Wu C-Y, Kirby R, Kao C-H, Tsai T-F. A role for the CISD2 gene in lifespan control and human disease.  
832 *Ann N Y Acad Sci* [Internet]. 2010 Jul [cited 2018 Jun 12];1201(1):58–64. Available from:  
833 <http://doi.wiley.com/10.1111/j.1749-6632.2010.05619.x>
- 834 40. Wang C-H, Kao C-H, Chen Y-F, Wei Y-H, Tsai T-F. Cisd2 mediates lifespan: is there an interconnection among Ca  
835 <sup>2+</sup> homeostasis, autophagy, and lifespan? *Free Radic Res* [Internet]. 2014 Sep 29 [cited 2018 Jun  
836 12];48(9):1109–14. Available from: <http://www.tandfonline.com/doi/full/10.3109/10715762.2014.936431>
- 837 41. Zheng J, Erzurumluoglu AM, Elsworth BL, Kemp JP, Howe L, Haycock PC, et al. LD Hub: a centralized database  
838 and web interface to perform LD score regression that maximizes the potential of summary level GWAS data  
839 for SNP heritability and genetic correlation analysis. *Bioinformatics* [Internet]. 2017 Jan 15 [cited 2018 May  
840 15];33(2):272–9. Available from: [https://academic.oup.com/bioinformatics/article-](https://academic.oup.com/bioinformatics/article-lookup/doi/10.1093/bioinformatics/btw613)  
841 [lookup/doi/10.1093/bioinformatics/btw613](https://academic.oup.com/bioinformatics/article-lookup/doi/10.1093/bioinformatics/btw613)
- 842 42. Kops GJPL, Medema RH, Glassford J, Essers MAG, Dijkers PF, Coffey PJ, et al. Control of cell cycle exit and entry  
843 by protein kinase B-regulated forkhead transcription factors. *Mol Cell Biol* [Internet]. 2002 Apr [cited 2018  
844 May 23];22(7):2025–36. Available from: <http://www.ncbi.nlm.nih.gov/pubmed/11884591>
- 845 43. Bonafè M, Barbieri M, Marchegiani F, Olivieri F, Ragno E, Giampieri C, et al. Polymorphic Variants of Insulin-  
846 Like Growth Factor I (IGF-I) Receptor and Phosphoinositide 3-Kinase Genes Affect IGF-I Plasma Levels and  
847 Human Longevity: Cues for an Evolutionarily Conserved Mechanism of Life Span Control. *J Clin Endocrinol*

- 848 Metab [Internet]. 2003 Jul 1 [cited 2018 May 23];88(7):3299–304. Available from:  
849 <https://academic.oup.com/jcem/article-lookup/doi/10.1210/jc.2002-021810>
- 850 44. Wu C-Y, Chen Y-F, Wang C-H, Kao C-H, Zhuang H-W, Chen C-C, et al. A persistent level of *Cisd2* extends healthy  
851 lifespan and delays aging in mice. *Hum Mol Genet* [Internet]. 2012 Sep 15 [cited 2018 May 23];21(18):3956–  
852 68. Available from: <https://academic.oup.com/hmg/article-lookup/doi/10.1093/hmg/dds210>
- 853 45. Chen Y-F, Kao C-H, Chen Y-T, Wang C-H, Wu C-Y, Tsai C-Y, et al. *Cisd2* deficiency drives premature aging and  
854 causes mitochondria-mediated defects in mice. *Genes Dev* [Internet]. 2009 May 15 [cited 2018 May  
855 23];23(10):1183–94. Available from: <http://www.ncbi.nlm.nih.gov/pubmed/19451219>
- 856 46. Vågerö D, Aronsson V, Modin B. Why is parental lifespan linked to children’s chances of reaching a high age? A  
857 transgenerational hypothesis. *SSM - Popul Heal* [Internet]. 2018 Apr [cited 2018 Nov 5];4:45–54. Available  
858 from: <http://www.ncbi.nlm.nih.gov/pubmed/29349272>
- 859 47. Horvath S, Gurven M, Levine ME, Trumble BC, Kaplan H, Allayee H, et al. An epigenetic clock analysis of  
860 race/ethnicity, sex, and coronary heart disease. *Genome Biol* [Internet]. 2016 Dec 11 [cited 2018 May  
861 14];17(1):171. Available from: <http://genomebiology.biomedcentral.com/articles/10.1186/s13059-016-1030-0>
- 862 48. Smith BH, Campbell H, Blackwood D, Connell J, Connor M, Deary IJ, et al. Generation Scotland: the Scottish  
863 Family Health Study; a new resource for researching genes and heritability. *BMC Med Genet* [Internet]. 2006  
864 Dec 2 [cited 2018 May 15];7(1):74. Available from:  
865 <http://bmcmedgenet.biomedcentral.com/articles/10.1186/1471-2350-7-74>
- 866 49. Smith BH, Campbell A, Linksted P, Fitzpatrick B, Jackson C, Kerr SM, et al. Cohort Profile: Generation Scotland:  
867 Scottish Family Health Study (GS:SFHS). The study, its participants and their potential for genetic research on  
868 health and illness. *Int J Epidemiol* [Internet]. 2013 Jun 1 [cited 2018 May 15];42(3):689–700. Available from:  
869 <https://academic.oup.com/ije/article-lookup/doi/10.1093/ije/dys084>
- 870 50. Houseman EA, Accomando WP, Koestler DC, Christensen BC, Marsit CJ, Nelson HH, et al. DNA methylation  
871 arrays as surrogate measures of cell mixture distribution. *BMC Bioinformatics* [Internet]. 2012 May 8 [cited  
872 2018 Jun 4];13:86. Available from: <http://www.ncbi.nlm.nih.gov/pubmed/22568884>
- 873 51. Nagy R, Boutin TS, Marten J, Huffman JE, Kerr SM, Campbell A, et al. Exploration of haplotype research  
874 consortium imputation for genome-wide association studies in 20,032 Generation Scotland participants.  
875 *Genome Med* [Internet]. 2017 Dec 7 [cited 2018 May 15];9(1):23. Available from:

- 876 <http://genomemedicine.biomedcentral.com/articles/10.1186/s13073-017-0414-4>
- 877 52. Yang J, Zaitlen NA, Goddard ME, Visscher PM, Price AL. Advantages and pitfalls in the application of mixed-  
878 model association methods. *Nat Genet* [Internet]. 2014 Feb 1 [cited 2018 May 14];46(2):100–6. Available  
879 from: <http://www.nature.com/articles/ng.2876>
- 880 53. Yang J, Lee SH, Goddard ME, Visscher PM. GCTA: A Tool for Genome-wide Complex Trait Analysis. *Am J Hum*  
881 *Genet* [Internet]. 2011 Jan 7 [cited 2018 May 14];88(1):76–82. Available from:  
882 <https://www.sciencedirect.com/science/article/pii/S0002929710005987?via%3Dihub>
- 883 54. Zaitlen N, Kraft P, Patterson N, Pasaniuc B, Bhatia G, Pollack S, et al. Using Extended Genealogy to Estimate  
884 Components of Heritability for 23 Quantitative and Dichotomous Traits. Visscher PM, editor. *PLoS Genet*  
885 [Internet]. 2013 May 30 [cited 2018 May 15];9(5):e1003520. Available from:  
886 <http://dx.plos.org/10.1371/journal.pgen.1003520>
- 887 55. Hall LS, Adams MJ, Arnau-Soler A, Clarke T-K, Howard DM, Zeng Y, et al. Genome-wide meta-analyses of  
888 stratified depression in Generation Scotland and UK Biobank. *Transl Psychiatry* [Internet]. 2018 Dec; Available  
889 from: <https://doi.org/10.1038/s41398-017-0034-1>
- 890 56. Bulik-Sullivan BK, Loh P-R, Finucane HK, Ripke S, Yang J, Patterson N, et al. LD Score regression distinguishes  
891 confounding from polygenicity in genome-wide association studies. *Nat Genet* [Internet]. 2015 Feb 2 [cited  
892 2018 May 14];47(3):291–5. Available from: <http://www.nature.com/doi/10.1038/ng.3211>
- 893 57. Willer CJ, Li Y, Abecasis GR. METAL: fast and efficient meta-analysis of genomewide association scans.  
894 *Bioinformatics* [Internet]. 2010 Sep 1 [cited 2018 May 14];26(17):2190–1. Available from:  
895 <http://www.ncbi.nlm.nih.gov/pubmed/20616382>
- 896 58. Watanabe K, Taskesen E, van Bochoven A, Posthuma D. Functional mapping and annotation of genetic  
897 associations with FUMA. *Nat Commun* [Internet]. 2017 Dec 28 [cited 2018 May 14];8(1):1826. Available from:  
898 <http://www.nature.com/articles/s41467-017-01261-5>
- 899 59. Gibbs RA, Boerwinkle E, Doddapaneni H, Han Y, Korchina V, Kovar C, et al. A global reference for human  
900 genetic variation. *Nature* [Internet]. 2015 Oct 1 [cited 2018 Sep 28];526(7571):68–74. Available from:  
901 <http://www.nature.com/articles/nature15393>
- 902 60. Pruim RJ, Welch RP, Sanna S, Teslovich TM, Chines PS, Gliedt TP, et al. LocusZoom: regional visualization of



- 903 genome-wide association scan results. *Bioinformatics* [Internet]. 2010 Sep 15 [cited 2018 May  
904 15];26(18):2336–7. Available from: [https://academic.oup.com/bioinformatics/article-](https://academic.oup.com/bioinformatics/article-lookup/doi/10.1093/bioinformatics/btq419)  
905 [lookup/doi/10.1093/bioinformatics/btq419](https://academic.oup.com/bioinformatics/article-lookup/doi/10.1093/bioinformatics/btq419)
- 906 61. Welter D, MacArthur J, Morales J, Burdett T, Hall P, Junkins H, et al. The NHGRI GWAS Catalog, a curated  
907 resource of SNP-trait associations. *Nucleic Acids Res* [Internet]. 2014 Jan 1 [cited 2018 May 15];42(D1):D1001–  
908 6. Available from: <https://academic.oup.com/nar/article-lookup/doi/10.1093/nar/gkt1229>
- 909 62. MacArthur J, Bowler E, Cerezo M, Gil L, Hall P, Hastings E, et al. The new NHGRI-EBI Catalog of published  
910 genome-wide association studies (GWAS Catalog). *Nucleic Acids Res* [Internet]. 2017 Jan 4 [cited 2018 May  
911 15];45(D1):D896–901. Available from: [https://academic.oup.com/nar/article-](https://academic.oup.com/nar/article-lookup/doi/10.1093/nar/gkw1133)  
912 [lookup/doi/10.1093/nar/gkw1133](https://academic.oup.com/nar/article-lookup/doi/10.1093/nar/gkw1133)
- 913 63. Consortium T 1000 GP. An integrated map of genetic variation from 1,092 human genomes. *Nature* [Internet].  
914 2012 Nov [cited 2018 May 14];491(7422):56–65. Available from:  
915 <http://www.nature.com/articles/nature11632>
- 916 64. Wang K, Li M, Hakonarson H. ANNOVAR: functional annotation of genetic variants from high-throughput  
917 sequencing data. *Nucleic Acids Res* [Internet]. 2010 Sep 1 [cited 2018 May 14];38(16):e164–e164. Available  
918 from: <https://academic.oup.com/nar/article-lookup/doi/10.1093/nar/gkq603>
- 919 65. Boyle AP, Hong EL, Hariharan M, Cheng Y, Schaub MA, Kasowski M, et al. Annotation of functional variation in  
920 personal genomes using RegulomeDB. *Genome Res* [Internet]. 2012 Sep [cited 2018 May 14];22(9):1790–7.  
921 Available from: <http://www.ncbi.nlm.nih.gov/pubmed/22955989>
- 922 66. Ernst J, Kellis M. ChromHMM: automating chromatin-state discovery and characterization. *Nat Methods*  
923 [Internet]. 2012 Mar 1 [cited 2018 May 14];9(3):215–6. Available from:  
924 <http://www.nature.com/articles/nmeth.1906>
- 925 67. Kundaje A, Meuleman W, Ernst J, Bilenky M, Yen A, Heravi-Moussavi A, et al. Integrative analysis of 111  
926 reference human epigenomes. *Nature* [Internet]. 2015 Feb 19 [cited 2018 May 14];518(7539):317–30.  
927 Available from: <http://www.nature.com/articles/nature14248>
- 928 68. Zhu Z, Zhang F, Hu H, Bakshi A, Robinson MR, Powell JE, et al. Integration of summary data from GWAS and  
929 eQTL studies predicts complex trait gene targets. *Nat Genet* [Internet]. 2016 May 28 [cited 2018 May  
930 14];48(5):481–7. Available from: <http://www.nature.com/articles/ng.3538>

- 931 69. de Leeuw CA, Mooij JM, Heskes T, Posthuma D. MAGMA: generalized gene-set analysis of GWAS data. *PLoS*  
932 *Comput Biol* [Internet]. 2015 Apr [cited 2018 May 15];11(4):e1004219. Available from:  
933 <http://www.ncbi.nlm.nih.gov/pubmed/25885710>
- 934 70. GTEx Consortium Gte. Human genomics. The Genotype-Tissue Expression (GTEx) pilot analysis: multitissue  
935 gene regulation in humans. *Science* [Internet]. 2015 May 8 [cited 2018 May 15];348(6235):648–60. Available  
936 from: <http://www.ncbi.nlm.nih.gov/pubmed/25954001>
- 937 71. Aguet F, Brown AA, Castel SE, Davis JR, He Y, Jo B, et al. Genetic effects on gene expression across human  
938 tissues. *Nature* [Internet]. 2017 Oct 11 [cited 2018 May 15];550(7675):204–13. Available from:  
939 <http://www.nature.com/doi/10.1038/nature24277>
- 940 72. Miller JA, Ding S-L, Sunkin SM, Smith KA, Ng L, Szafer A, et al. Transcriptional landscape of the prenatal human  
941 brain. *Nature* [Internet]. 2014 Apr 2 [cited 2018 May 15];508(7495):199–206. Available from:  
942 <http://www.nature.com/doi/10.1038/nature13185>
- 943 73. Bulik-Sullivan B, Finucane HK, Anttila V, Gusev A, Day FR, Loh P-R, et al. An atlas of genetic correlations across  
944 human diseases and traits. *Nat Genet* [Internet]. 2015 Nov 28 [cited 2018 May 15];47(11):1236–41. Available  
945 from: <http://www.nature.com/articles/ng.3406>
- 946 74. Benjamini Y, Hochberg Y. Controlling the False Discovery Rate: A Practical and Powerful Approach to Multiple  
947 Testing. *Source J R Stat Soc Ser B* [Internet]. 1995 [cited 2018 May 15];57(1):289–300. Available from:  
948 <http://www.jstor.org/stable/2346101>
- 949
- 950
- 951
- 952
- 953
- 954
- 955

## 956 **Supporting Information**

957

### 958 **S1 Text: Supplementary Information**

959 S1 Text contains further information on the Hannum and Horvath epigenetic clocks, measures of  
960 epigenetic age and epigenetic age acceleration, DNA methylation in GS, derivation of epigenetic  
961 age and epigenetic age acceleration variables in GS, genotyping, imputation, and quality control in  
962 GS.

963

### 964 **S1 Data: Supplementary Tables**

965 **Table A:** Summary of age and estimated epigenetic age variables in Generation Scotland

966 **Table B:** Independent variants with a genome-wide significant association ( $P < 5 \times 10^{-8}$ ) with  
967 epigenetic age acceleration in the Generation Scotland cohort

968 **Table C:** Independent variants with a  $P$ -value  $< 5 \times 10^{-8}$  for association with Horvath-  
969 EAA/Hannum-EAA in the Lu et al. sample, and their corresponding effect size and  
970 significance in the Generation Scotland cohort

971 **Table D:** Estimated polygenicity and SNP-based heritability using LD score regression

972 **Table E:** Full details of independent variants with a genome-wide significant association  
973 ( $P < 5 \times 10^{-8}$ ) with Horvath-based or Hannum-based epigenetic age acceleration

974 **Table F:** Independent variants with a  $P$ -value  $< 5 \times 10^{-8}$  for association with Horvath-  
975 EAA/Hannum-EAA in the meta-analysis, and their corresponding effect size and  
976 significance in the Generation Scotland and Lu samples

977 **Table G:** Summary of the independent variants significantly associated with either Horvath-  
978 EAA or Hannum-EAA, and their association with both epigenetic age acceleration measures

979 **Table H:** Functional annotation of all SNPs in LD ( $r^2 \geq 0.6$ ) with FUMA-identified  
980 independent significant SNPs for Horvath-EAA

981 **Table I:** Functional annotation of all SNPs in LD ( $r^2 \geq 0.6$ ) with FUMA-identified  
982 independent significant SNPs for Hannum-EAA

983 **Table J:** MAGMA gene property analysis (30 general tissue types) for the meta-analysis of  
984 Horvath-EAA

985 **Table K:** MAGMA gene property analysis (53 specific tissue types) for the meta-analysis of  
986 Horvath-EAA

987 **Table L:** MAGMA gene property analysis (29 different ages of brain samples) for the meta-  
988 analysis of Horvath-EAA

989 **Table M:** MAGMA gene property analysis (11 different developmental stages of brain  
990 samples) for the meta-analysis of Horvath-EAA

991 **Table N:** MAGMA gene property analysis (30 general tissue types) for the meta-analysis of  
992 Hannum-EAA

993 **Table O:** MAGMA gene property analysis (53 specific tissue types) for the meta-analysis of  
994 Hannum-EAA

995 **Table P:** MAGMA gene property analysis (29 different ages of brain samples) for the meta-  
996 analysis of Hannum-EAA

997 **Table Q:** MAGMA gene property analysis (11 different developmental stages of brain  
998 samples) for the meta-analysis of Hannum-EAA

999 **Table R:** Expression quantitative trait loci identified by analysis of independent significant  
1000 variants for Horvath-EAA and Hannum-EAA and the significance of their expression in the  
1001 specified tissues

1002 **Table S:** Genome-wide significant gene-based results ( $P < 2.809 \times 10^{-6}$ ) obtained by MAGMA  
1003 gene-based association analyses of Horvath-EAA and Hannum-EAA

1004 **Table T:** Most associated gene sets for the GWAS meta-analysis of Horvath-EAA

1005 **Table U:** Most associated gene sets for the GWAS meta-analysis of Hannum-EAA

1006 **Table V:** Genetic correlations between Horvath-EAA and 218 other health and behavioural  
1007 traits

1008 **Table W:** Genetic correlations between Hannum-EAA and 218 other health and behavioural  
1009 traits

1010 **Table X:** Overview of study datasets

1011

## 1012 **S2 Text: Supplementary Figures**

1013 **Fig A:** SNP-based Manhattan plot for the GWAS analysis of Horvath-based epigenetic age  
1014 acceleration and Hannum-based epigenetic age acceleration in the GS cohort

1015 **Fig B:** QQ plots for the GWAS of Horvath-EAA and Hannum-EAA in GS

1016 **Figs C-L:** Regional association plots for the independent SNPs that are significantly  
1017 associated with Horvath-EAA

1018 **Fig M:** Regional association plot for the independent significantly associated SNP with  
1019 Hannum-EAA

1020 **Fig N:** Scatter plot of  $-\log_{10}(\text{association } P\text{-value})$  for SNP-based GWAS of Horvath-EAA vs  
1021  $-\log_{10}(\text{association } P\text{-value})$  for SNP-based GWAS of Hannum-EAA

1022 **Fig O:** Scatter plot of  $-\log_{10}(\text{association } P\text{-value})$  for gene-based GWAS of Horvath-EAA  
1023 vs  $-\log_{10}(\text{association } P\text{-value})$  for gene-based GWAS of Hannum-EAA

1024 **Fig P:** Manhattan plots for the MAGMA gene-based association analysis for the GWAS  
1025 meta-analysis of Horvath-based epigenetic age acceleration and Hannum-based epigenetic  
1026 age acceleration

1027 **Fig Q:** QQ plots for the gene-based association analyses of Horvath-EAA and Hannum-EAA

# Manhattan plot for Horvath-EAA

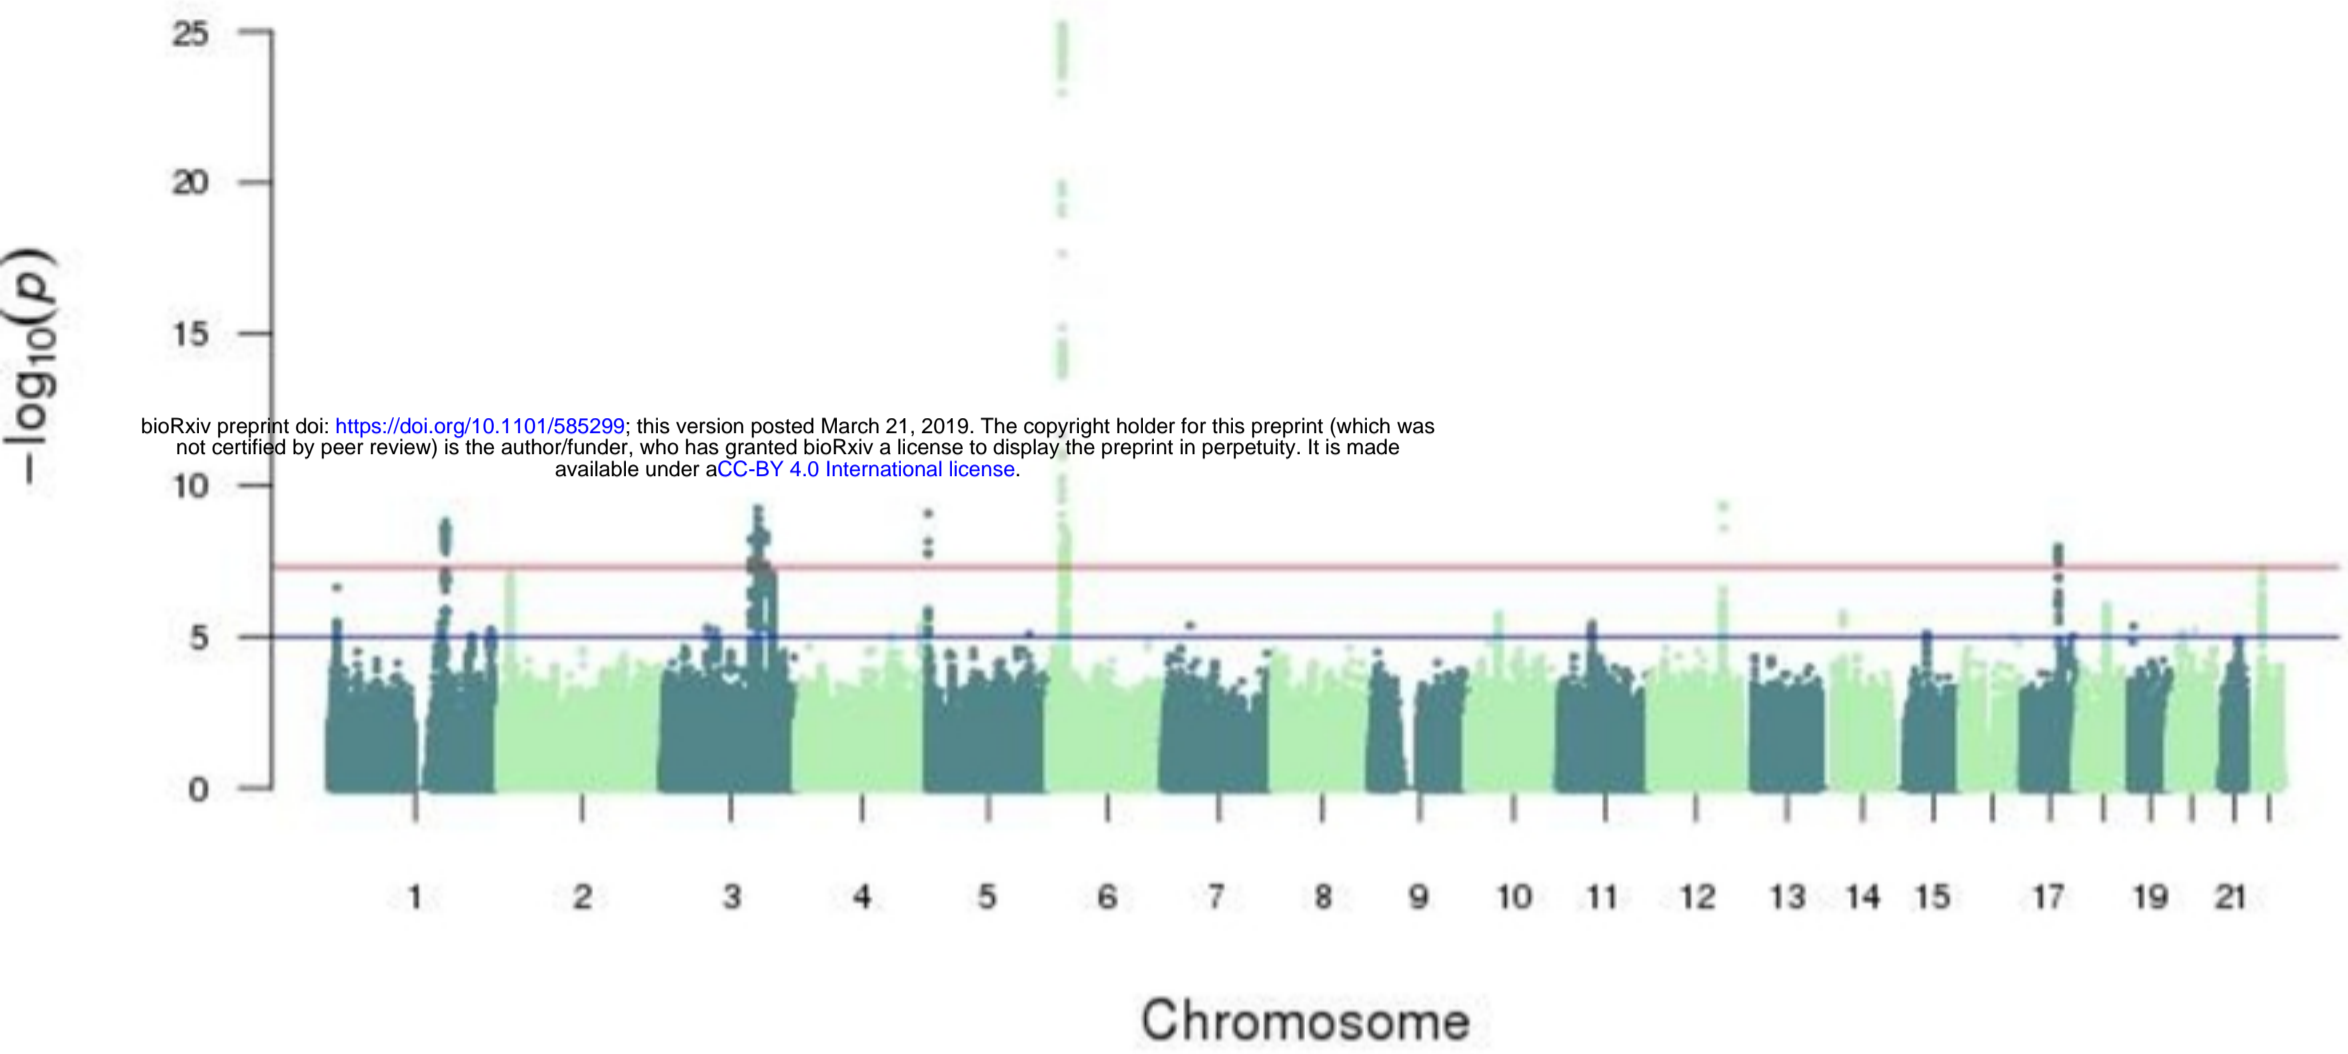

# Manhattan plot for Hannum-EAA

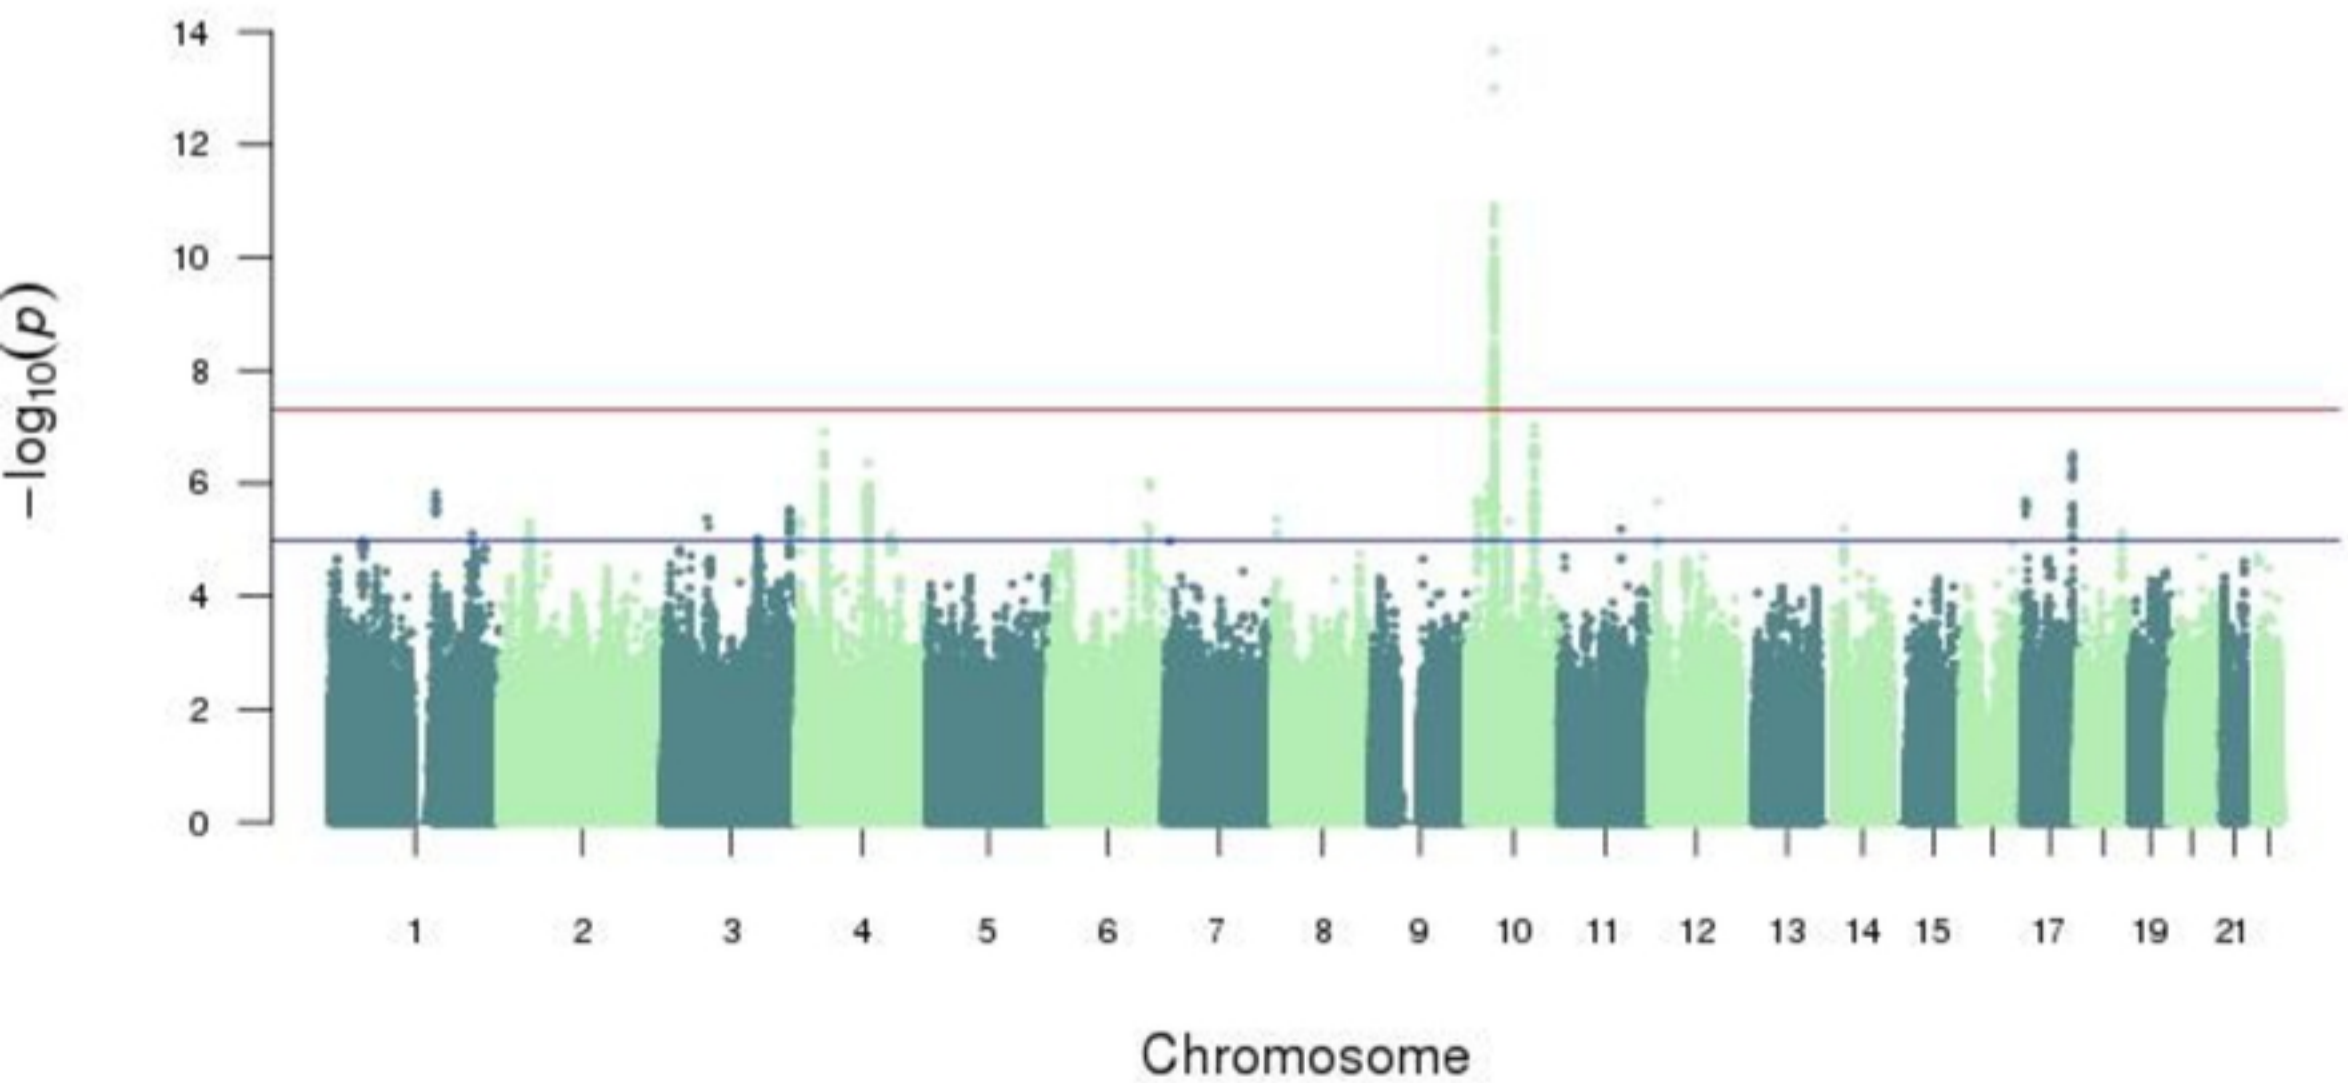

Figure 1

Q-Q plot of Hannum-EAA GWAS p-values

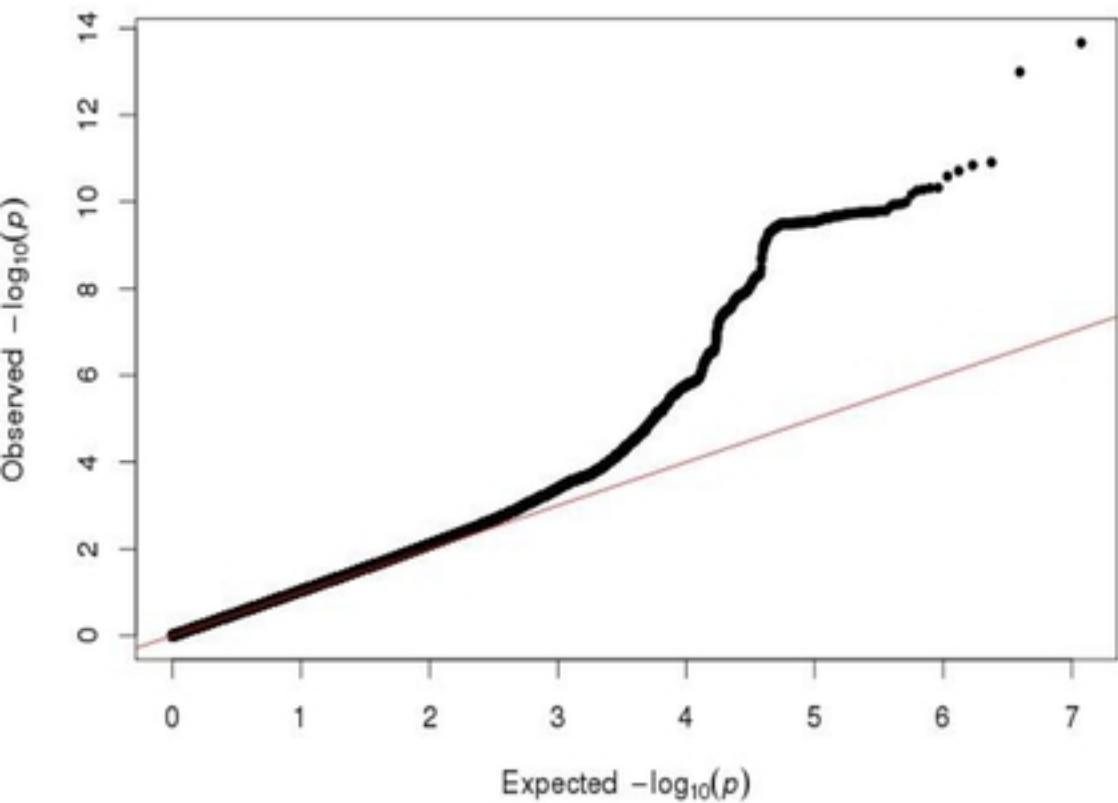

Q-Q plot of Horvath-EAA GWAS p-values

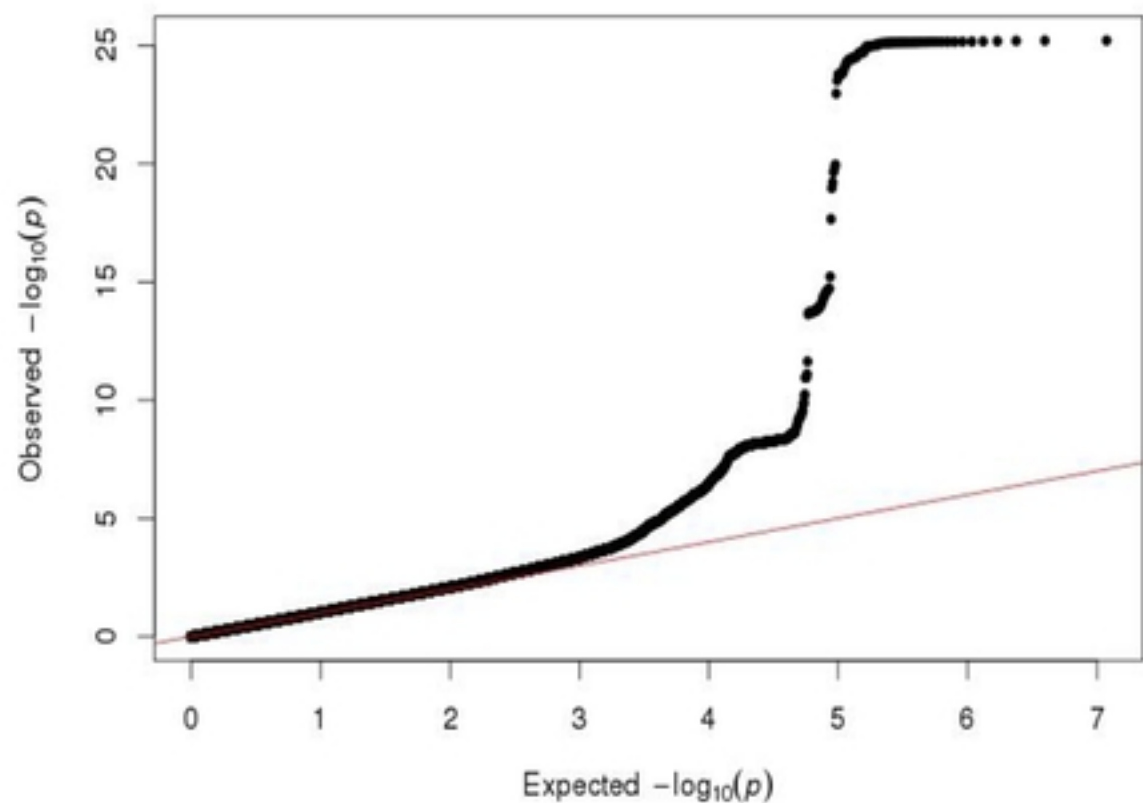

Figure 2
